# Supplementary material
Source: PubMed Central journal article supplement (PMC7228464)
Supplement: bloodBLD2019003179-suppl1.pdf [file bloodBLD2019003179-suppl1.pdf]

## Supplemental Materials for

### CD49d promotes disease progression in chronic lymphocytic leukemia: new insights from CD49d bimodal expression

#### Supplemental information:

- **Supplemental materials and methods**

- **Supplemental Tables:**

- o Supplemental Table 1. Baseline characteristics of the whole cohort and of cohort A and cohort B CLL patients.
- o Supplemental Table 2. Baseline characteristics of CLL patients treated with ibrutinib.
- o Supplemental Table 3. *IGHV* gene usage and status in CLL with bimodal CD49d expression.
- o Supplemental Table 4. FISH analysis in sorted CD49d<sup>neg</sup> and CD49d<sup>pos</sup> CLL cells.
- o Supplemental Table 5. Mutation analysis in sorted CD49d<sup>neg</sup> and CD49d<sup>pos</sup> CLL cells.
- o Supplemental Table 6. Baseline characteristics of CLL with homogeneous or bimodal CD49d expression.
- o Supplemental Table 7. Cox regression analysis of overall survival including *TP53* disruption.
- o Supplemental Table 8. Cox regression analysis of treatment-free survival.
- o Supplemental Table 9. Comparison of multivariable Cox regression analyses of overall survival (n=1,045).

- **Supplemental Figures:**

- o Supplemental Figure 1. Guidelines for the analysis of CD49d bimodal expression.
- o Supplemental Figure 2. CD49d expression over time.

- o Supplemental Figure 3. Flow cytometry analysis to determine the amount of CD49d<sup>pos</sup> cells in intra-clonal populations from bimCD49d CLL.
- o Supplemental Figure 4. Proliferation rates in CD49d<sup>neg</sup> and CD49d<sup>pos</sup> fractions from bimCD49d CLL.
- o Supplemental Figure 5. Flow cytometry analysis of proliferation rates in CD49d<sup>neg</sup> and CD49d<sup>pos</sup> sorted fractions from bimodal CD49d CLL.
- o Supplemental Figure 6. Telomere length analysis in paired CD49d<sup>neg</sup> and CD49d<sup>pos</sup> CLL sub-populations.
- o Supplemental Figure 7. Clinical impact of CD49d bimodal expression.
- o Supplemental Figure 8. Receiver Operating Characteristics' (ROC) curve analysis in CLL with CD49d bimodal expression using the overall survival readout.
- o Supplemental Figure 9. Clinical impact as OS predictors of the main clinical and biological parameters in CLL from cohort A and cohort B.
- o Supplemental Figure 10. Receiver Operating Characteristics' (ROC) curve analysis in CLL with CD49d bimodal expression using the treatment-free survival readout.
- o Supplemental Figure 11. Clinical impact as TFS predictors of the main clinical and biological parameters in CLL from cohort A and cohort B.
- o Supplemental Figure 12. Clinical impact of CD49d expression in bimCD49d in terms of treatment-free survival.
- o Supplemental Figure 13. Clinical impact of CD49d expression in the context of ibrutinib treatment.
- o Supplemental Figure 14. CD49d expression at pre-treatment and after ibrutinib therapy.

## Supplemental materials and methods

### Immunophenotypic analysis

CD49d expression was analysed by 3-color immunofluorescence, by combining anti-CD49d-PE (clone 9F10), anti-CD5-FITC, and anti-CD19-PerCP-Cy5.5 or anti-CD19-APC (all from BD Biosciences). CD49d expression data were reported as percent of CD5<sup>+</sup>CD19<sup>+</sup> CLL cells displaying specific fluorescence intensity greater than the 98% to 99% of the same unstained population. The detection of CLL subpopulations with different CXCR4/CD5 intensity of expression was determined by a four-color immunofluorescence that included an anti-CXCR4-APC mAb (BD Bioscience) to the above reported antibody combination. The CXCR4<sup>dim</sup>/CD5<sup>bright</sup> and the CXCR4<sup>bright</sup>/CD5<sup>dim</sup> populations were defined as described.<sup>1</sup> For each specimen, at least 10 000 CD5<sup>+</sup>CD19<sup>+</sup> events were collected.

### Definition of CD49d bimodal expression

The gating strategy used for the analysis of CD49d expression, depicted in Supplemental Figure 1A, was the following: 1) the lymphocyte population was selected on a forward- versus side-scatter (FSC/SSC) plot (R1); 2) CLL cells (CD19+CD5+) were selected on a CD19 versus CD5 dot plot gated in R1. The CLL region was drawn close to the CD19+CD5+ population in order to exclude the few CD19+CD5- cells corresponding to residual normal B cells that express CD49d at high levels;<sup>2</sup> 3) CD49d expression was displayed both in an histogram plot and in a CD19 versus CD49d dot plot, gated in the CLL region.

Bimodality for CD49d was defined as the presence of either two well-defined peaks (left panels on Supplemental Figure 1B) or two adjacent but distinct peaks (right panels on Supplemental Figure 1B) within the malignant clone always separated by a “nadir” in histogram plots viewed in both linear scale and in logarithmic (log) scale. Due to the possible appearance in log scale of a second mode despite the actual unimodal distribution in linear scale, all the cases of the present study were labeled as “bimodal” when a clear bimodal pattern (i.e. two peaks separated by a “nadir”) was confirmed in both log and linear scale, according to reported recommendations.<sup>3</sup> In text and figures, either the linear or the log scales were used, for the sake of clarity. The lower limit of detection of a distinct CD49d<sup>pos</sup> population was 1%, corresponding to at least 100 CD49d<sup>pos</sup> cells over 10,000

total cells (example in Supplemental Figure 1C). The concomitant analysis of CD49d expression on a dot plot and on a histogram plot allowed to better detect the presence of small sub-populations (dot plot), and to better discriminate the separation of two distinct peaks (histogram plot) (Supplemental Figure 1B). All cases were analyzed independently by two operators (AZ and FP), and any discrepancy was resolved by review of the histogram plots by both parties.

### **Cell sorting**

Cell sorting of CLL CD49d<sup>neg</sup> and CD49d<sup>pos</sup> subpopulations was performed using a FACSAriaIII (BD Biosciences) using a CD5-FITC, CD19-PerCP-Cy5.5, CD49d-APC or CD5-FITC, CD19-APC, CD49d-PE antibody combinations (all from BD Biosciences). A purity >95% was obtained for all samples.

### **Proliferation assays**

Either total or CD49d<sup>neg</sup>, and CD49d<sup>pos</sup> sorted CLL cells were cultured on a layer of M210B4 cells (ATCC, Manassas, VA, USA) in complete RPMI with 7.5 mg/ml phosphorothioate CpG/ODN oligonucleotide 2006 (5-TCGTCGTTTTGTCGTTTTGTCGTT-3; Microsynth, Balgach, Switzerland) plus interleukin-2 (IL-2; R&D Systems, Minneapolis, MN, USA) in the presence of 10  $\mu$ M 5-ethynyl-2'-deoxyuridine (EdU) for 48 hours. After harvesting, cells were washed, stained with anti-CD5-FITC, anti-CD19-PerCP-Cy5.5 and anti-CD49d-APC, fixed, permeabilized and stained with an anti-EdU-Pacific blue reagent following the manufacturer's instructions (Click-iT® EdU, ThermoFisher Scientific, Waltham, MA, USA).

### **Telomere length analysis**

The high throughput STELA assay used in this study,<sup>4</sup> adapted from the previously published STELA protocol<sup>5,6</sup> used the telomere-adjacent primers specific for the XpYp telomere (XpYpC: 5'-CAGGGACCGGGACAAATAGAC-3') and the 7q telomere (7qK1: 5'-GGGCACTGCCTCGCTTTGA-3'), in triplicate 30 $\mu$ l PCR reactions each containing 30ng of genomic DNA. Amplified fragments were resolved using capillary gel 100 electrophoresis and mean telomere length determined using PROSize software (AATI, Ankeny, Iowa, USA).

## Statistics

Statistical analyses were performed using the MedCalc software (MedCalc Software, Mariakerke, Belgium) or the R statistical package (<http://www.r-project.org/>). Normally distributed data were compared using t-tests (paired or unpaired), non-parametric data using Mann Whitney test (independent) or Wilcoxon high rank test (paired analysis). Counts and frequency distributions were performed for discrete parameters. Significance of association between considered factors was assessed using  $\chi^2$  test. The overall concordance correlation coefficient (CCC) was used to evaluate the stability of CD49d expression overtime. For clinical analyses, the primary end points were overall survival (OS) and treatment-free survival (TFS), defined as described.<sup>7</sup> CLL patients treated with ibrutinib were not included in the analyses of OS and were analyzed separately using the progression-free survival (PFS) end point, defined as the time from the start of ibrutinib until progression or death. Treatment response was evaluated according to 2008 revised International Workshop on CLL (IWCLL) incorporating the 2012 clarifications for patients treated with kinase inhibitors as previously reported.<sup>8-10</sup> TFS, OS and PFS probabilities were estimated by the Kaplan-Meier method, and patients alive and treatment/progression-free were censored at the last follow-up. Log-rank test was used to compare TFS, OS and PFS probabilities between subgroups. Median follow-up was computed using the OS database and applying the inverted censoring method. Cox models were used to verify independent prognostic power of each parameter. Model minimization was performed by stepwise backward elimination. A P-value of 0.05 was considered to be statistically significant. Departure from proportionality in hazard was tested in all Cox models. The predictive power of the Cox models was evaluated according to Harrell's c-index, with corresponding 95% confidence intervals. The difference in the predictive power of the two CD49d categorizations was tested comparing 500 replicates using a bootstrap resampling procedure through *t*-test.

## References

1. Calissano C, Damle RN, Marsilio S, et al. Intraclonal complexity in chronic lymphocytic leukemia: fractions enriched in recently born/divided and older/quiescent cells. *Mol Med*. 2011;17(11-12):1374-1382.
2. Hartmann TN, Grabovsky V, Wang W, et al. Circulating B-cell chronic lymphocytic leukemia cells display impaired migration to lymph nodes and bone marrow. *Cancer Res*. 2009;69(7):3121-3130.
3. Erez A, Vogel R, Mugler A, Belmonte A, Altan-Bonnet G. Modeling of cytometry data in logarithmic space: When is a bimodal distribution not bimodal? *Cytometry A*. 2018;93(6):611-619.

4. Norris K, Hillmen P, Rawstron A, et al. Telomere length predicts for outcome to FCR chemotherapy in CLL. *Leukemia*. 2019;33(8):1953-1963.
5. Britt-Compton B, Lin TT, Ahmed G, et al. Extreme telomere erosion in ATM-mutated and 11q-deleted CLL patients is independent of disease stage. *Leukemia*. Vol. 26. England; 2012:826-830.
6. Capper R, Britt-Compton B, Tankimanova M, et al. The nature of telomere fusion and a definition of the critical telomere length in human cells. *Genes Dev*. 2007;21(19):2495-2508.
7. Gattei V, Bulian P, Del Principe MI, et al. Relevance of CD49d protein expression as overall survival and progressive disease prognosticator in chronic lymphocytic leukemia. *Blood*. 2008;111(2):865-873.
8. Ahn IE, Underbayev C, Albitar A, et al. Clonal evolution leading to ibrutinib resistance in chronic lymphocytic leukemia. *Blood*. 2017;129(11):1469-1479.
9. Farooqui MZ, Valdez J, Martyr S, et al. Ibrutinib for previously untreated and relapsed or refractory chronic lymphocytic leukaemia with TP53 aberrations: a phase 2, single-arm trial. *Lancet Oncol*. 2015;16(2):169-176.
10. Hallek M, Cheson BD, Catovsky D, et al. Guidelines for the diagnosis and treatment of chronic lymphocytic leukemia: a report from the International Workshop on Chronic Lymphocytic Leukemia updating the National Cancer Institute-Working Group 1996 guidelines. *Blood*. 2008;111(12):5446-5456.

**Supplemental Table 1. Baseline characteristics of the whole cohort and of cohort A and cohort B CLL patients.**

| Factor*                  | whole cohort |           | cohort A   |           | cohort B   |           | p values† |
|--------------------------|--------------|-----------|------------|-----------|------------|-----------|-----------|
|                          |              | cases (n) |            | cases (n) |            | cases (n) |           |
| age, median (range), y   | 64 (31-88)   | 1,630     | 64 (33-88) | 764       | 64 (31-88) | 866       | 0.39      |
| >65                      | 773 (47.4)   |           | 366 (47.9) |           | 407 (47)   |           | 0.75      |
| male sex                 | 987 (60.5)   | 1,630     | 447 (58.5) | 764       | 540 (62.3) | 866       | 0.12      |
| median follow-up, months | 85           |           | 95         |           | 76         |           | 0.23      |
| OS events                | 279 (18.3)   | 1,522     | 128 (18.5) | 692       | 151 (18.2) | 830       |           |
| median TFS, months       | 77           |           | 75         |           | 83         |           | 0.73      |
| treated                  | 804 (49.3)   | 1,630     | 395 (51.7) | 764       | 409 (47.5) | 861       |           |
| Rai stage II-IV          | 378 (23.3)   | 1,623     | 187 (24.5) | 763       | 191 (22.2) | 860       | 0.30      |
| β2M> ULN                 | 545 (49.5)   | 1,100     | 343 (50.1) | 677       | 202 (47.8) | 423       | 0.32      |
| CD49d expression‡        |              | 1,630     |            | 764       |            | 866       |           |
| bimCD49d <sup>neg</sup>  | 147 (9.0)    |           | 66 (8.6)   |           | 81 (9.3)   |           |           |
| bimCD49d <sup>pos</sup>  | 166 (10.2)   |           | 70 (9.2)   |           | 96 (11.1)  |           | 0.13      |
| homCD49d <sup>neg</sup>  | 757 (46.4)   |           | 344 (45)   |           | 413 (47.7) |           |           |
| homCD49d <sup>pos</sup>  | 560 (34.4)   |           | 284 (37.2) |           | 276 (31.9) |           |           |
| UM <i>IGHV</i>           | 593 (39.8)   | 1,490     | 269 (37.6) | 715       | 324 (41.8) | 775       | 0.11      |
| FISH category§           |              | 1,514     |            | 658       |            | 856       |           |
| del17p                   | 126 (8.3)    |           | 58 (8.8)   |           | 68 (7.9)   |           | 0.61      |
| del11q                   | 156 (10.3)   |           | 66 (10)    |           | 90 (10.6)  |           | 0.82      |
| tri12                    | 234 (15.4)   |           | 99 (15.0)  |           | 135 (15.8) |           | 0.70      |
| del13q                   | 582 (38.4)   |           | 262 (39.8) |           | 320 (37.4) |           | 0.33      |
| normal                   | 416 (27.5)   |           | 173 (26.3) |           | 243 (28.4) |           | 0.36      |
| <i>TP53</i> mutated      | 132 (9.8)    | 1,352     | 73 (10.5)  | 693       | 59 (9.0)   | 659       | 0.33      |
| <i>TP53</i> disrupted    | 190 (14.7)   | 1,290     | 94 (15.4)  | 610       | 96 (14.1)  | 680       | 0.51      |
| <i>NOTCH1</i> mutated    | 288 (18.6)   | 1,547     | 133 (17.5) | 759       | 155 (19.7) | 788       | 0.31      |

Cohort A includes CLL patients from a single Institution (S. Eugenio Hospital and University of Tor Vergata, Rome); cohort B includes patients from 5 Institutions (Ferrarotto Hospital, Catania; Amedeo Avogadro University of Eastern Piedmont, Novara; Azienda Ospedaliera

Universitaria S. Maria Misericordia, Udine; Maggiore General Hospital, University of Trieste, Trieste; Centro di Riferimento Oncologico della Basilicata, I.R.C.C.S., Rionero in Vulture).

\*For all reported factors, the values refer to number of cases (%) unless otherwise specified; †all p values (for cohort A and B comparisons) refer to the  $\chi^2$  test, with the exception of those associated to age (Mann-Whitney test), and to OS and TFS (log-rank test); ‡CLL cases were split in four groups according to the level and pattern of CD49d expression: bimCD49d<sup>neg</sup>, <30% bimodal; bimCD49d<sup>pos</sup>, ≥30% bimodal; homCD49d<sup>neg</sup>, <30% homogeneous; homCD49d<sup>pos</sup>, ≥30% homogeneous; §FISH categories were as reported by Dohner et al (Dohner H, N Engl J Med. 2000;343:1910-6); §  
β2M indicates beta-2 microglobulin; del, deletion; TFS, treatment-free survival; tri, trisomy; ULN, upper limit of normal; UM, unmutated.



**Supplemental Table 2. Baseline characteristics of CLL patients treated with ibrutinib.**

| Factor*                                        |            | cases available |
|------------------------------------------------|------------|-----------------|
| age, median (range), y                         | 69 (36-90) | 158             |
| >65, n (%)                                     | 102 (64.5) | 158             |
| male sex, n (%)                                | 102 (64.5) | 158             |
| median follow-up, months                       | 16         | 158             |
| progression events, n (%)                      | 41 (25.9)  |                 |
| Rai stage III-IV, n (%)                        | 48 (30.4)  | 158             |
| Treatment status, RR                           | 135 (85.4) | 158             |
| Lines of therapy >1                            | 86 (54.8)  | 157             |
| $\beta$ 2M $\geq$ 5 mg/L, n (%)                | 60 (38.2)  | 157             |
| Hemoglobin <110 g/L for women/<120 g/L for men | 41 (33.1)  | 124             |
| LDH >ULN                                       | 43 (34.7)  | 124             |
| Time from last therapy <24 months              | 72 (58.1)  | 124             |
| CD49d expression <sup>†</sup>                  |            | 158             |
| bimCD49d <sup>neg</sup>                        | 12 (7.6)   |                 |
| bimCD49d <sup>pos</sup>                        | 27 (17.1)  |                 |
| homCD49d <sup>neg</sup>                        | 48 (30.4)  |                 |
| homCD49d <sup>pos</sup>                        | 71 (44.9)  |                 |
| UM <i>IGHV</i>                                 | 111 (73.5) | 151             |
| FISH category <sup>‡</sup>                     |            | 138             |
| del17p                                         | 47 (34.0)  |                 |
| del11q                                         | 21 (15.2)  |                 |
| tri12                                          | 19 (13.8)  |                 |
| del13                                          | 23 (16.7)  |                 |
| normal                                         | 28 (20.3)  |                 |
| <i>TP53</i> mutated                            | 57 (38.3)  | 149             |
| <i>TP53</i> disrupted                          | 76 (54.3)  | 140             |
| <i>NOTCH1</i> mutated                          | 50 (33.6)  | 149             |

\*For all reported factors, the values refer to number of cases (%) unless otherwise specified;†CD49d categories are as reported in footnote “‡” in Supplemental Table 1; ‡ FISH categories are as reported in footnote “§” in Supplemental Table 1.  
RR, relapsed/refractory; all other abbreviations are explained in Supplemental Table 1.

**Supplemental Table 3. *IGHV* gene usage and status in CLL with bimodal CD49d expression.**

| sample | <i>IGHV</i> status | V gene*allele | D gene*allele | J gene*allele |
|--------|--------------------|---------------|---------------|---------------|
| CT100† | UM                 | 1-2*02        | 3-3*01        | 5*02          |
| CT104  | UM                 | 7-4-1*02      | 5-24*01       | 4*02          |
| CT114  | UM                 | 3-11*01       | 3-3*01        | 6*02          |
| CT115† | UM                 | 1-69*01       | 3-3*01        | 6*02          |
| CT118  | M                  | 3-21*01       | na            | 6*02          |
| CT121† | UM                 | 1-2*02        | 2-2*01        | 6*02          |
| CT124  | M                  | 3-30*18       | 3-10*01       | 6*02          |
| CT125  | M                  | 3-23*01       | 1-1*01        | 3*02          |
| CT126  | UM                 | 3-9*01        | 3-16*01       | na            |
| CT129† | M                  | 3-74*01       | 3-16*01       | 4*02          |
| CT138† | M                  | 3-11*01       | 5-5*01        | 6*02          |
| CT142  | UM                 | 3-30*03       | 3-3*01        | 6*02          |
| CT147  | M                  | 3-15*01       | 2-15*01       | 4*02          |
| CT149  | UM                 | 1-69*12       | 3-3*01        | 6*03          |
| CT15   | UM                 | 3-9*01        | 3-3*01        | 6*02          |
| CT151  | UM                 | 1-69*01       | 4-23*01       | 6*02          |
| CT155  | M                  | 3-7*01        | 3-10*01       | 2*01          |
| CT157  | M                  | 3-33*05       | 1-26*01       | 3*01          |
| CT168  | UM                 | 5-a*01        | 6-25*01       | 4*02          |
| CT190† | M                  | 3-72*01       | 2-2*02        | 4*02          |
| CT193  | M                  | 3-7*01        | 5-24*01       | 1*01          |
| CT194  | M                  | 3-11*01       | 3-9*01        | 6*02          |
| CT208  | M                  | 1-3*01        | 5-18*01       | 4*02          |
| CT213  | UM                 | 1-2*04        | 2-15*01       | 6*02          |
| CT219  | UM                 | 3-23*04       | 3-9*01        | 4*02          |
| CT227  | M                  | 2-26*01       | 2-21*01       | 3*02          |
| CT23   | M                  | 4-39*01       | 2-2*01        | 5*02          |
| CT237  | M                  | 4-59*08       | 3-10*01       | 6*02          |
| CT240  | UM                 | 1-2*02        | 3-9*01        | 4*02          |
| CT252  | M                  | 4-39*01       | 3-9*01        | 5*02          |

---

|        |    |           |         |      |
|--------|----|-----------|---------|------|
| CT255  | UM | 3-33*01   | 3-3*01  | 4*02 |
| CT268  | UM | 1-69*01   | 3-22*01 | 2*01 |
| CT276† | UM | 3-11*01   | 3-3*01  | 6*02 |
| CT283† | M  | 4-34*01   | 2-15*01 | 5*01 |
| CT285  | M  | 3-30*02   | 6-25*01 | 4*02 |
| CT287† | M  | 1-46*01   | 3-10*01 | 3*01 |
| CT292  | M  | 4-34*01   | 6-19*01 | 3*02 |
| CT295  | UM | 3-30*03   | 3-3*01  | 6*02 |
| CT302  | UM | 1-69*06   | 3-16*02 | 3*02 |
| CT306  | UM | 3-30-3*01 | 3-10*01 | 6*02 |
| CT314  | M  | 3-7*01    | 6-19*01 | 3*01 |
| CT315  | UM | 3-30*08   | 3-3*01  | 4*02 |
| CT316  | M  | 4-34*01   | 3-9*01  | 4*02 |
| CT33   | M  | 4-59*01   | 6-19*01 | 4*02 |
| CT335  | UM | 1-69*01   | 3-3*01  | 6*02 |
| CT338  | M  | 4-31*03   | 4-17*01 | 3*02 |
| CT339  | UM | 1-69*01   | 3-16*02 | 3*02 |
| CT353  | M  | 1-8*01    | 2-2*01  | 5*02 |
| CT357  | M  | 3-15*07   | 3-16*01 | 4*02 |
| CT373  | UM | 1-69*01   | 3-3*01  | 6*02 |
| CT378  | UM | 4-59*01   | 3-22*01 | 6*03 |
| CT380  | M  | 3-23*04   | 3-22*01 | 4*02 |
| CT381  | UM | 5-51*01   | 3-22*01 | 4*02 |
| CT388  | UM | 3-30*03   | 6-13*01 | 3*02 |
| CT410  | UM | 3-33*01   | 6-13*01 | 4*02 |
| CT412  | UM | 3-30-3*01 | 2-15*01 | 4*02 |
| CT418  | UM | 1-2*02    | 1-26*01 | 6*02 |
| CT42   | UM | 1-69*06   | 3-16*02 | 3*02 |
| CT447  | UM | 1-69*06   | 3-16*02 | 3*02 |
| CT48   | M  | 4-34*04   | 1-26*01 | 3*02 |
| CT50   | M  | 3-7*01    | 6-19*01 | 4*02 |
| CT71   | UM | 1-69*01   | 3-3*01  | 6*02 |

---

---

|        |    |         |         |      |
|--------|----|---------|---------|------|
| CT72   | M  | 3-33*01 | 2-15*01 | 4*02 |
| CT94   | UM | 3-15*01 | 2-2*02  | 6*03 |
| RIO14  | M  | 3-21*01 | 3-10*01 | 3*02 |
| RIO17  | UM | 3-21*02 | 5-24*01 | 6*02 |
| RIO2   | UM | 1-69*01 | 2-2*01  | 6*02 |
| RIO22  | UM | 3-23*01 | 3-10*01 | 4*02 |
| RIO27† | M  | 3-64*01 | 5-12*01 | 6*03 |
| RIO29  | M  | 3-15*01 | 2-2*01  | 3*01 |
| RIO4   | M  | 4-34*01 | 2-15*01 | 4*02 |
| RIO45  | M  | 3-74*03 | 3-22*01 | 4*02 |
| RIO5   | M  | 3-11*04 | 2-21*01 | 6*02 |
| RIO53  | UM | 1-69*01 | 2-8*02  | 6*02 |
| RIO55  | UM | 3-48*03 | 2-15*01 | 6*02 |
| RIO66  | UM | 1-46*01 | 3-10*01 | 5*02 |
| RM108  | M  | 3-30*03 | 3-16*01 | 4*02 |
| RM120  | UM | 1-69*01 | 3-3*01  | 6*03 |
| RM129  | UM | 03-Nov  | 5-24    | 6    |
| RM133  | M  | 1-46*01 | 2-15*01 | 5*02 |
| RM138† | M  | 4-39*01 | 3-22*01 | 4*02 |
| RM139  | M  | 3-53*01 | 2-15*01 | 5*02 |
| RM150  | M  | 3-74*01 | 4-23*01 | 5*02 |
| RM164  | UM | 1-69*01 | 3-3*01  | 6*02 |
| RM17   | M  | 3-23*01 | 2-15*01 | 1*01 |
| RM184  | M  | 4-34*01 | 1-26*01 | 4*02 |
| RM185† | UM | 1-69*01 | 2-15*01 | 6*02 |
| RM204† | M  | 3-7*01  | 2-2*01  | 4*02 |
| RM209  | M  | 3-30*03 | 3-10*01 | 4*02 |
| RM212† | M  | 1-2*06  | 2-15*01 | 5*02 |
| RM213  | M  | 3-7*01  | 2-2*02  | 4*02 |
| RM214  | M  | 3-23*04 | 3-16*01 | 4*02 |
| RM235  | M  | 4-34*01 | 3-9*01  | 4*02 |
| RM236  | UM | 3-23*01 | 3-10*01 | 4*02 |

---

---

|        |    |           |         |      |
|--------|----|-----------|---------|------|
| RM238  | M  | 3-23*01   | 1-1*01  | 4*02 |
| RM24   | UM | 1-3*01    | 5-12*01 | 6*02 |
| RM247  | UM | 4-31*03   | 3-3*01  | 5*02 |
| RM25   | UM | 3-48*01   | 5-24*01 | 6*03 |
| RM258  | M  | 3-30-3*01 | 1-26*01 | 6*02 |
| RM290† | M  | 3-21*01   | 5-24*01 | 6*02 |
| RM292  | UM | 1-2*02    | 3-22*01 | 6*02 |
| RM305  | M  | 4-4*02    | 4-17*01 | 4*02 |
| RM307  | M  | 3-30*19   | 5-12*01 | 3*01 |
| RM33   | M  | 3-64*05   | 2-15*01 | 4*02 |
| RM342  | UM | 2-5*01    | 3-22*01 | 6*02 |
| RM349† | M  | 3-30*03   | 6-19*01 | 4*02 |
| RM37   | M  | 3-7*01    | na      | 4*02 |
| RM376  | M  | 3-7*02    | 2-15*01 | 4*02 |
| RM377  | M  | 2-5*04    | 6-13*01 | 4*02 |
| RM382  | M  | 3-7*01    | 3-22*01 | 4*02 |
| RM394  | M  | 3-30*01   | 3-3*01  | 4*02 |
| RM402† | M  | 3-13*01   | 1-7*01  | 4*02 |
| RM409  | UM | 1-69*01   | 3-9*01  | 6*03 |
| RM429  | M  | 1-69*06   | 3-22*01 | 4*02 |
| RM436  | M  | 3-9*01    | 1-26*01 | 4*02 |
| RM445† | M  | 1-8*01    | 3-10*01 | 6*03 |
| RM470  | UM | 3-7*01    | 3-10*01 | 4*02 |
| RM474  | UM | 3-33*01   | 3-3*01  | 5*02 |
| RM491  | M  | 3-49*03   | 3-22*01 | 6*02 |
| RM503  | M  | 3-30*18   | 3-16*02 | 6*02 |
| RM518  | M  | 4-39*01   | 2-2*01  | 4*02 |
| RM528  | M  | 4-30-4*01 | 6-19*01 | 1*01 |
| RM529  | M  | 3-7*01    | 5-24*01 | 2*01 |
| RM53   | M  | 4-34*01   | 6-13*01 | 4*02 |
| RM537  | UM | 3-33*01   | 3-3*01  | 4*02 |
| RM543  | M  | 3-23*01   | 6-19*01 | 6*02 |

---

---

|        |    |           |         |      |
|--------|----|-----------|---------|------|
| RM547  | M  | 4-34*01   | 3-22*01 | 4*02 |
| RM555  | UM | 4-39*01   | 1-20*01 | 5*02 |
| RM560  | UM | 3-53*01   | 3-22*01 | 6*02 |
| RM566  | M  | 3-30*03   | 1-26*01 | 4*02 |
| RM576  | UM | 4-39*01   | 3-22*01 | 4*02 |
| RM583† | M  | 3-53*01   | 6-19*01 | 4*02 |
| RM591  | UM | 1-69*01   | 3-10*01 | 6*02 |
| RM594  | M  | 1-3*01    | 5-12*01 | 4*02 |
| RM596  | M  | 3-33*01   | 6-13*01 | 6*02 |
| RM598  | M  | 3-33*01   | 2-15*01 | 4*02 |
| RM623  | M  | 3-72*01   | 1-26*01 | 3*02 |
| RM624  | M  | 3-33*01   | 1-7*01  | 3*01 |
| RM626  | M  | 3-74*02   | 1-20*01 | 4*02 |
| RM631  | UM | 5-51*01   | 3-22*01 | 4*02 |
| RM640† | UM | 1-3*01    | 6-19*01 | 4*02 |
| RM648  | M  | 4-34*01   | 2-2*02  | 4*02 |
| RM652  | M  | 1-2*02    | 7-27*01 | 3*02 |
| RM653  | UM | 5-51*01   | 3-22*01 | 4*02 |
| RM654  | M  | 3-30-3*01 | 4-17*01 | 6*02 |
| RM675  | M  | 4-34*01   | 5-12*01 | 2*01 |
| RM681  | UM | 4-39*01   | 6-13*01 | 5*02 |
| RM685  | M  | 4-34*01   | 5-24*01 | 4*02 |
| RM692  | UM | 1-69*01   | 3-3*01  | 6*02 |
| RM693  | M  | 1-3*01    | 2-21*01 | 5*02 |
| RM697  | M  | 2-5*10    | 4-17*01 | 4*02 |
| RM698  | M  | 1-8*01    | 4-23*01 | 5*01 |
| RM705  | M  | 2-5*01    | 1-7*01  | 4*02 |
| RM706  | M  | 4-34*01   | 5-18*01 | 3*01 |
| RM711  | M  | 4-34*01   | 2-8*01  | 4*02 |
| RM714  | M  | 3-72*01   | 1-1*01  | 5*02 |
| RM722  | M  | 3-15*01   | 1-26*01 | 4*02 |
| RM726† | M  | 3-23*01   | 5-18*01 | 4*02 |

---

---

|           |    |           |         |      |
|-----------|----|-----------|---------|------|
| RM735     | M  | 4-34*08   | 1-26*01 | 5*01 |
| RM749     | M  | 3-30*18   | 6-19*01 | 6*02 |
| RM75      | M  | 3-23*01   | 6-19*01 | 4*02 |
| RM771     | UM | 3-23*01   | 2-2*01  | 4*02 |
| RM773     | M  | 4-30-4*03 | 6-19*01 | 4*02 |
| RM79      | UM | 1-2*02    | 1-26*02 | 6*02 |
| RM86      | UM | 3-49*05   | 3-9*01  | 4*02 |
| RMPTV10   | UM | 4-39*01   | 3-3*01  | 4*02 |
| RMPTV100† | M  | 4-30-4*01 | 3-9*01  | 5*02 |
| RMPTV122† | UM | 4-34*01   | 2-15*01 | 6*04 |
| RMPTV133  | UM | 3-33*01   | 2-2*01  | 6*02 |
| RMPTV137  | UM | 3-15*01   | 3-16*01 | 5*02 |
| RMPTV138  | M  | 6-1*01    | 6-19*01 | 5*01 |
| RMPTV140  | UM | 1-69*01   | 3-10*01 | 6*02 |
| RMPTV143  | M  | 4-34*01   | 2-2*01  | 4*02 |
| RMPTV154  | UM | 1-69*06   | 6-19*01 | 1*01 |
| RMPTV156  | UM | 1-69*01   | 3-3*01  | 6*02 |
| RMPTV165  | M  | 3-7*03    | 3-22*01 | 3*01 |
| RMPTV168  | UM | 3-74*01   | 4-23*01 | 6*02 |
| RMPTV17   | M  | 3-30-3*01 | 3-16*01 | 3*02 |
| RMPTV176  | M  | 4-34*01   | 5-18*01 | 3*02 |
| RMPTV18   | UM | 3-15*01   | 3-3*01  | 6*02 |
| RMPTV182  | M  | 6-1*02    | 2-15*01 | 5*01 |
| RMPTV191  | M  | 3-23*04   | 6-13*01 | 4*02 |
| RMPTV195  | M  | 2-2*02    | 2-21*01 | 4*02 |
| RMPTV2    | UM | 1-69*01   | 2-15*01 | 4*02 |
| RMPTV209  | M  | 3-21*01   | 1-14*01 | 6*02 |
| RMPTV211  | UM | 1-3*01    | 5-12*01 | 4*02 |
| RMPTV22   | UM | 1-69*01   | 2-2*01  | 6*03 |
| RMPTV39   | UM | 3-33*01   | 3-10*01 | 6*02 |
| RMPTV42   | UM | 1-69*01   | 3-16*01 | 3*02 |
| RMPTV43   | M  | 3-74*01   | 5-12*01 | 4*02 |

---



---

|          |    |         |         |      |
|----------|----|---------|---------|------|
| RMPTV53  | M  | 3-33*01 | 3-10*01 | 3*01 |
| RMPTV56† | UM | 3-48*02 | 4-17*01 | 4*02 |
| RMPTV58  | M  | 3-23*04 | 1-26*01 | 4*02 |
| RMPTV67  | UM | 1-3*01  | 6-19*01 | 4*02 |
| RMPTV84  | M  | 3-15*01 | 4-17*01 | 4*02 |
| RMPTV94  | M  | 3-74*01 | 1-14*01 | 4*01 |
| RMPTV95  | UM | 1-69*01 | 2-2*01  | 6*02 |
| RMPTV97  | UM | 4-39*01 | 1-26*01 | 6*02 |
| TS110    | M  | 3-48*03 | 3-3*01  | 4*02 |
| TS122    | M  | 4-34*01 | 2-15*01 | 6*03 |
| TS131    | UM | 1-69*01 | 2-2*02  | 5*02 |
| TS142†   | M  | 3-23*01 | 2-15*01 | 4*02 |
| TS145    | M  | 4-4*02  | 1-17*01 | 5*02 |
| TS164    | M  | 4-34*01 | 3-16*02 | 4*02 |
| TS166†   | UM | 3-30*03 | 3-3*01  | 4*02 |
| TS177†   | UM | 3-7*01  | 4-17*01 | 6*02 |
| TS178    | M  | 3-7*01  | 2-21*01 | 3*02 |
| TS181    | M  | 3-23*01 | 3-16*01 | 4*02 |
| TS182    | M  | 4-34*01 | 6-19*01 | 6*02 |
| TS189    | UM | 4-34*01 | 3-22*01 | 2*01 |
| TS19†    | UM | 3-48*03 | 2-2*02  | 6*02 |
| TS28     | UM | 4-34*01 | 2-8*02  | 6*02 |
| TS63     | UM | 3-23*01 | 3-10*01 | 6*02 |
| TS69     | M  | 4-34*01 | 6-13*01 | 6*02 |
| TS84     | M  | 4-34*01 | 6-13*01 | 6*02 |
| TS85     | M  | 3-23*04 | 3-9*01  | 4*02 |
| UD31     | UM | 1-2*02  | 6-19*01 | 4*02 |
| UD35     | M  | 3-74*01 | 6-13*01 | 4*02 |
| UD4†     | M  | 3-21*01 | na      | 6*02 |
| UD57     | M  | 3-7*01  | 6-13*01 | 6*02 |
| UD75†    | M  | 4-31*02 | 3-10*01 | 6*02 |
| UD82     | M  | 3-23*01 | 6-19*01 | 4*02 |

---

---

|       |    |           |    |    |
|-------|----|-----------|----|----|
| NO39  | M  | 3-33*01   | na | na |
| NO66  | M  | 3-23*01   | na | na |
| NO69  | UM | 4-30-4*01 | na | na |
| NO72  | M  | 1-46*01   | na | na |
| NO73  | M  | 4-34*01   | na | na |
| NO76  | M  | 4-34*01   | na | na |
| NO82  | M  | 3-23*01   | na | na |
| NO83  | M  | 4-30-4*01 | na | na |
| NO88  | M  | 2-5*10    | na | na |
| NO91  | M  | 4-4*02    | na | na |
| NO93  | M  | 2-5*10    | na | na |
| NO94  | M  | 3-53*01   | na | na |
| NO97  | M  | 3-33*01   | na | na |
| NO104 | M  | 3-9*01    | na | na |
| NO105 | M  | 3-48*01   | na | na |
| NO106 | UM | 1-69*01   | na | na |
| NO109 | M  | 5-51*01   | na | na |
| NO113 | M  | 3-74*01   | na | na |
| NO114 | M  | 3-30*02   | na | na |
| NO116 | M  | 3-11*01   | na | na |
| NO118 | M  | 1-69*01   | na | na |
| NO120 | UM | 6-1*01    | na | na |
| NO121 | UM | 3-48*01   | na | na |
| NO123 | M  | 4-34*01   | na | na |
| NO125 | M  | 1-8*02    | na | na |
| NO129 | M  | 3-48*01   | na | na |
| NO130 | UM | 3-23*01   | na | na |
| NO132 | M  | 4-34*01   | na | na |
| NO134 | UM | 2-5*01    | na | na |
| NO136 | UM | 1-2*02    | na | na |
| NO137 | M  | 1-69*06   | na | na |
| NO138 | M  | 3-21*01   | na | na |

---

---

|        |       |                 |                 |           |
|--------|-------|-----------------|-----------------|-----------|
| NO139  | M     | 5-51*01         | na              | na        |
| NO140  | M     | 4-39*01         | na              | na        |
| NO141  | UM    | 1-69*06         | na              | na        |
| NO142  | UM    | 1-3*01          | na              | na        |
| NO143  | UM    | 6-1*01          | na              | na        |
| NO144  | M     | 1-8*01          | na              | na        |
| NO145  | M     | 4-34*01         | na              | na        |
| NO147  | UM    | 1-3*02          | na              | na        |
| NO148  | M     | 3-7*01          | na              | na        |
| NO149  | M     | 4-34*01         | na              | na        |
| NO150  | M     | 4-34*01         | na              | na        |
| NO151  | UM    | 4-39*01         | na              | na        |
| NO152  | UM    | 3-30-3*01       | na              | na        |
| NO157  | UM    | 1-3*01          | na              | na        |
| NO158  | M     | 3-33*01         | na              | na        |
| NO159  | UM    | 4-34*01         | na              | na        |
| NO160  | M     | 4-34*03         | na              | na        |
| NO162  | M     | 4-34*01         | na              | na        |
| NO163  | M     | 4-34*01         | na              | na        |
| NO165  | UM    | 1-69*01         | na              | na        |
| NO167  | UM    | 1-69*01         | na              | na        |
| NO169  | M     | 1-2*02          | na              | na        |
| NO171  | UM    | 3-21*01         | na              | na        |
| NO172  | M     | 4-61*02         | na              | na        |
| NO173  | M     | 1-3*01          | na              | na        |
| NO174  | M     | 3-21*01         | na              | na        |
| NO177  | UM    | 3-48*03         | na              | na        |
| NO189  | M     | 3-48*03         | na              | na        |
| NO170  | UM    | 1-2*02          | na              | na        |
| UD47†† | UM/M  | 3-43*01/4-34*03 | 3-22*01/5-18*01 | 6*02/4*02 |
| RIO52‡ | UM/UM | 1-18*04/3-33*01 | 6-19*01/6-19*01 | 6*02/6*02 |
| RM207‡ | UM/M  | 4-4*07/3-7*02   | 3-10*01/2-8*01  | 6*02/3*02 |

---

|           |       |                 |                 |           |
|-----------|-------|-----------------|-----------------|-----------|
| RM273‡    | M/M   | 3-74*01/4-39*01 | 5-5*01/2-21*01  | 4*02/4*02 |
| RM230‡    | M/M   | 3-23*01/1-46*01 | 2-21*01/5-24*01 | 6*02/4*02 |
| RM556‡    | M/M   | 4-61*02/1-3*01  | 5-12*01/1-26*01 | 4*02/4*02 |
| RM542‡    | UM/M  | 4-34*01/3-74*01 | 2-15*01/3-16*02 | 6*02/4*02 |
| RM390‡    | M/M   | 1-2*02/3-7*01   | 1-1*01/3-22*01  | 6*02/5*01 |
| RM667‡    | UM/UM | 1-69*01/5-a*03  | 2-2*01/3-3*01   | 6*02/6*02 |
| RM625‡    | M/M   | 2-5*10/6-1*01   | 1-1*01/4-17*01  | 4*02/3*02 |
| RM578‡    | M/M   | 3-30*04/3-30*04 | 1-1*01/1-7*01   | 4*02/4*03 |
| CT337‡    | M/M   | 3-30*02/3-48*04 | 1-1*01/2-21*02  | 5*01/6*02 |
| RMPTV147‡ | M/M   | 4-34*01/3-30*03 | 1-26*01/6-13*02 | 3*01/4*02 |
| CT423‡    | UM/UM | 1-69*01/1-69*01 | 3-3*01/2-2*01   | 6*02/6*02 |

*IGHV* genes were sequenced by Sanger sequencing and analysed with the IMGT/V-QUEST tool (<http://www.imgt.org>);

†cases used for *IGHV* sequence analysis by NGS in the sorted CD49d<sup>neg</sup> and CD49d<sup>pos</sup> fractions; in all cases, NGS analysis confirmed the reported *IGHV* sequences in both CD49d<sup>neg</sup> and CD49d<sup>pos</sup> fractions;

‡cases displaying two concomitant *IGHV* sequences (bi-clonal samples);

M, mutated *IGHV*, na, not available, UM, unmutated *IGHV*.

**Supplemental Table 4. FISH analysis in sorted CD49d<sup>neg</sup> and CD49d<sup>pos</sup> CLL cells.**

| sample   | cytogenetic aberration | % aberration on CD49d <sup>neg</sup> cells | % aberration on CD49d <sup>pos</sup> cells | p values* |
|----------|------------------------|--------------------------------------------|--------------------------------------------|-----------|
| CT72     | tri12                  | 3                                          | 50                                         |           |
| CT388    | tri12                  | 73                                         | 71                                         |           |
| CT378    | tri12                  | 4                                          | 75                                         |           |
| RMPTV251 | tri12                  | 4                                          | 82                                         |           |
| CT329    | tri12                  | 3                                          | 69                                         |           |
| RM805    | tri12                  | 30                                         | 70                                         |           |
| RMPTV22  | tri12                  | 4                                          | 75                                         |           |
| RM185    | tri12                  | 67                                         | 69                                         | 0.0026    |
| RM474    | tri12                  | 74                                         | 71                                         |           |
| TOS50    | tri12                  | 57                                         | 72                                         |           |
| RM207    | tri12                  | 6                                          | 31                                         |           |
| CT276    | tri12                  | 77                                         | 71                                         |           |
| RMPTV122 | tri12                  | 71                                         | 82                                         |           |
| RM591    | tri12                  | 55                                         | 72                                         |           |
| CT126    | tri12                  | 73                                         | 76                                         |           |
| CT412    | del13                  | 11                                         | 17                                         |           |
| CT353    | del13                  | 35                                         | 83                                         |           |
| RM654    | del13                  | 59                                         | 27                                         |           |
| RM735    | del13                  | 22                                         | 17                                         |           |
| RM33     | del13                  | 64                                         | 16                                         |           |
| CT447    | del13                  | 21                                         | 85                                         |           |
| TOS83    | del13                  | 9                                          | 49                                         | 0.33      |
| RMPTV56  | del13                  | 14                                         | 94                                         |           |
| RM139    | del13                  | 59                                         | 50                                         |           |
| TOS33    | del13                  | 100                                        | 98                                         |           |
| RM17     | del13                  | 26                                         | 8                                          |           |
| RM207    | del13                  | 52                                         | 69                                         |           |
| RM290    | del13                  | 85                                         | 98                                         |           |

|          |                  |       |       |      |
|----------|------------------|-------|-------|------|
| RM583    | del13            | 95    | 90    |      |
| RIO27    | del13            | 15    | 30    |      |
| CRO173   | del13/ biallelic | 20/78 | 21/74 |      |
| RM445    | del13/ biallelic | 51/45 | 42/52 |      |
| RM212    | del13/ biallelic | 85/7  | 23/29 |      |
| UD75     | del13/ biallelic | 21/79 | 7/93  | 0.62 |
| TS142    | del13/ biallelic | 90/10 | 69/31 |      |
| CT129    | del13/ biallelic | 0/81  | 0/40  |      |
| TOS118   | del13/ biallelic | 0/46  | 0/12  |      |
| CT219    | del11            | 76    | 15    |      |
| RMPTV56  | del11            | 5     | 91    |      |
| TOS105   | del11            | 25    | 39    | 0.81 |
| CT219    | del11            | 87    | 52    |      |
| RMPTV137 | del11            | 88    | 7     |      |
| CT72     | del17            | 8     | 6     |      |
| CT219    | del17            | 4     | 3     |      |
| RMPTV53  | del17            | 50    | 35    |      |
| CT447    | del17            | 57    | 10    | 0.02 |
| RMPTV56  | del17            | 7     | 4     |      |
| CT115    | del17            | 15    | 12    |      |
| CT129    | del17            | 46    | 42    |      |

\*p values refer to the paired Wilcoxon test.

**Supplemental Table 5. Mutation analysis in sorted CD49d<sup>neg</sup> and CD49d<sup>pos</sup> CLL cells.**

| sample   | mutated gene | mutation description            | % mutation on CD49d <sup>neg</sup> cells | % mutation on CD49d <sup>pos</sup> cells | p values* |
|----------|--------------|---------------------------------|------------------------------------------|------------------------------------------|-----------|
| RIO66    | NOTCH1       | c.*7668+371A>G                  | 0                                        | 2.2                                      |           |
| TS63     | NOTCH1       | c.7541_7542del2, p.P2514Rfs*4   | 2.9                                      | 3.1                                      |           |
| TOS69    | NOTCH1       | c.7544_7545delCT, p.P2515fs*4   | 49.9                                     | 44.2                                     |           |
| RM185    | NOTCH1       | c.7544_7545delCT, p.P2515fs*4   | 5.2                                      | 48.5                                     |           |
| NO141    | NOTCH1       | c.7544_7545delCT, p.P2515fs*4   | 0.3                                      | 3.1                                      |           |
| NO159    | NOTCH1       | c.7544_7545delCT, p.P2515fs*4   | 0                                        | 3.7                                      |           |
| RM474    | NOTCH1       | c.7544_7545delCT, p.P2515fs*4   | 54.5                                     | 56.7                                     | 0.0122    |
| RM207    | NOTCH1       | c.7544_7545delCT, p.P2515fs*4   | 5.7                                      | 31.3                                     |           |
| RMPTV122 | NOTCH1       | c.7544_7545delCT, p.P2515fs*4   | 14.2                                     | 46.1                                     |           |
| RIO27    | NOTCH1       | c.7544_7545delCT, p.P2515fs*4   | 3.0                                      | 3.9                                      |           |
| TS142    | NOTCH1       | c.7544_7545delCT, p.P2515fs*4   | 3.6                                      | 9.8                                      |           |
| CT115    | NOTCH1       | c.7544_7545delCT, p.P2515fs*4   | 0.4                                      | 1.2                                      |           |
| RM238    | SF3B1        | c.2098A>G,p.K700E               | 1.6                                      | 2.8                                      |           |
|          |              | c.2110A>T,p.I704F               | 4.0                                      | 9.2                                      |           |
|          |              | c.2219G>A,p.G740E               | 5.0                                      | 1.2                                      |           |
|          |              | c.2223G>C,p.G741N               | 1.7                                      | 3.0                                      |           |
|          |              | c.2225G>A,p.G742D               | 1.7                                      | 0                                        |           |
| RMPTV147 | SF3B1        | c.2110A>T,p.I704F               | 0                                        | 3                                        | 0.19      |
|          |              | c.2111T>C,p.I704T               | 0                                        | 9.9                                      |           |
|          |              | c.2324G>T,p.R775L               | 5.8                                      | 1.9                                      |           |
| NO141    | SF3B1        | c.1996A>G p.K666E               | 4.1                                      | 11.2                                     |           |
| RM290    | SF3B1        | c.2098 A>G p.K700E              | 35.8                                     | 46.8                                     |           |
| RMPTV53  | TP53         | c.560-1G>A,p.?                  | 65.6                                     | 72.7                                     |           |
| RM528    | TP53         | c.712T>A,p.C238S                | 19.7                                     | 35.3                                     |           |
| RM108    | TP53         | c.646G>A,p.V216M                | 3.3                                      | 0                                        |           |
| RM692    | TP53         | c.596G>T,p.G199V                | 5.8                                      | 0                                        |           |
| CT338    | TP53         | c.472_477del,p.R158_A159del     | 8.5                                      | 0                                        | 0.27      |
|          |              | c.479_487del,p.M160_Y163delinsN | 8.5                                      | 0                                        |           |
|          |              | c.763A>T,p.I255F                | 4.2                                      | 0                                        |           |
| RIO22    | TP53         | c.406C>T,p.Q136X                | 0                                        | 5.3                                      |           |
| NO121    | TP53         | c.797G>A p.G266E                | 16.0                                     | 0.3                                      |           |

|       |       |                              |      |     |    |
|-------|-------|------------------------------|------|-----|----|
| NO177 | TP53  | c.817C>T p.R273C             | 48.0 | 0.1 |    |
| RM185 | BIRC3 | c.1639_1640delCA p.Q547fs*11 | 7.8  | 0   |    |
| RIO1  | BIRC3 | c.1654delC p.Q552fs*16       | 5.9  | 4.0 | na |

\*p values refer to the paired Wilcoxon test; na, not applicable.



**Supplemental Table 6. Baseline characteristics of CLL with homogeneous or bimodal CD49d expression.**

|                              | homCD49d <sup>neg*</sup> |     | homCD49d <sup>pos†</sup> |     | bimCD49d‡       |     | p values§                             |                                       |
|------------------------------|--------------------------|-----|--------------------------|-----|-----------------|-----|---------------------------------------|---------------------------------------|
|                              | cases available          |     | cases available          |     | cases available |     | bimCD49d‡ vs homCD49d <sup>neg*</sup> | bimCD49d‡ vs homCD49d <sup>pos†</sup> |
| age, median (range), y       | 63 (32-88)               | 757 | 65 (31-88)               | 560 | 64 (33-88)      | 313 | 0.04                                  | 0.76                                  |
| >65, n (%)                   | 340 (44.9)               |     | 282 (50.4)               |     | 151 (48.2)      |     | 0.29                                  | 0.60                                  |
| male sex, n (%)              | 438 (57.8)               | 757 | 355 (63.4)               | 560 | 194 (62.0)      | 313 | 0.24                                  | 0.73                                  |
| Rai stage II-IV, n (%)       | 111 (14.7)               | 755 | 191 (34.4)               | 555 | 71 (22.7)       | 313 | 0.002                                 | 0.0004                                |
| β2M> ULN, n (%)              | 206 (38.1)               | 540 | 202 (47.8)               | 340 | 116 (52.7)      | 220 | 0.0003                                | 0.14                                  |
| Lymphadenopathy, n (%)       | 333 (44.0)               | 757 | 343 (61.6)               | 557 | 151 (48.2)      | 313 | 0.20                                  | 0.0001                                |
| UM <i>IGHV</i> , n (%)       | 194 (28.1)               | 691 | 324 (64.2)               | 505 | 115 (39.1)      | 294 | 0.0008                                | <0.0001                               |
| FISH category¶               |                          | 705 |                          | 510 |                 | 299 |                                       |                                       |
| del17p, n (%)                | 45 (6.4)                 |     | 63 (12.4)                |     | 18 (6.0)        |     | 0.94                                  | 0.005                                 |
| del11q, n (%)                | 83 (11.8)                |     | 49 (9.6)                 |     | 24 (8.0)        |     | 0.09                                  | 0.53                                  |
| tri12, n (%)                 | 14 (2.0)                 |     | 158 (31.0)               |     | 62 (20.7)       |     | <0.0001                               | 0.002                                 |
| del13, n (%)                 | 385 (54.6)               |     | 99 (19.4)                |     | 98 (32.8)       |     | <0.0001                               | <0.0001                               |
| normal, n (%)                | 178 (25.2)               |     | 141 (27.6)               |     | 97 (32.4)       |     | 0.02                                  | 0.17                                  |
| <i>TP53</i> mutated, n (%)   | 44 (8.7)                 | 503 | 71 (17.9)                | 397 | 23 (10.1)       | 227 | 0.64                                  | 0.01                                  |
| <i>TP53</i> disrupted, n (%) | 54 (9.9)                 | 547 | 73 (18.2)                | 401 | 21 (7.7)        | 273 | 0.31                                  | 0.0001                                |
| <i>NOTCH1</i> mutated, n (%) | 62 (8.6)                 | 723 | 159 (30.1)               | 528 | 67 (22.6)       | 296 | <0.0001                               | 0.09                                  |

\*homCD49d<sup>neg</sup> indicates cases with <30% homogeneous CD49d expression; †homCD49d<sup>pos</sup> indicates cases with ≥30% homogeneous CD49d expression; ‡bimCD49d indicates cases with bimodal CD49d expression; §all p values refer to the  $\chi^2$  test, with the exception of p values associated to age that refer to the Mann-Whitney test; ||lymphadenopathy was evaluated at diagnosis; ¶FISH categories were as reported in footnote “‡” in Supplemental Table 1.

Abbreviations are explained in Supplemental Table 1.

**Supplemental Table 7. Cox regression analysis of overall survival including *TP53* disruption.**

| Factor                   | Multivariable analysis (n=1,058)<br>model I |           |          | Multivariable analysis (n=761)<br>model II |           |          |
|--------------------------|---------------------------------------------|-----------|----------|--------------------------------------------|-----------|----------|
|                          | HR                                          | 95% CI    | <i>p</i> | HR                                         | 95% CI    | <i>p</i> |
| homCD49d <sup>pos*</sup> | 2.09                                        | 1.50-2.92 | <0.0001  | 2.07                                       | 1.40-3.06 | 0.0002   |
| bimCD49d <sup>†</sup>    | 2.10                                        | 1.43-3.09 | 0.0001   | 2.33                                       | 1.52-3.56 | 0.0001   |
| age >65                  | 3.74                                        | 2.75-5.08 | <0.0001  | 3.41                                       | 2.36-4.93 | <0.0001  |
| Rai stage II-IV          | 1.85                                        | 1.38-2.49 | <0.0001  | n.i.                                       | n.i.      | n.i.     |
| UM <i>IGHV</i>           | 2.54                                        | 1.90-3.40 | <0.0001  | 2.72                                       | 1.95-3.79 | <0.0001  |
| <i>TP53</i> disruption   | 2.10                                        | 1.52-2.90 | <0.0001  | 2.01                                       | 1.38-2.92 | <0.0001  |
| del11q                   | n.i.                                        | n.i.      | n.i.     | n.i.                                       | n.i.      | n.i.     |
| tri12                    | n.i.                                        | n.i.      | n.i.     | n.i.                                       | n.i.      | n.i.     |
| <i>NOTCH1</i> mutated    | n.i.                                        | n.i.      | n.i.     | n.i.                                       | n.i.      | n.i.     |
| β2M >ULN                 | -                                           | -         | -        | 1.98                                       | 1.38-2.82 | 0.0002   |

All listed factor, with a significant *p* value by univariable analysis (see Table 1), were entered in the multivariable analysis;

\*homCD49d<sup>pos</sup> refers to CLL cases with ≥30% homogeneous expression of CD49d; † bimCD49d refers to CLL cases with bimodal expression of CD49d.

CI indicates confidence interval; HR, hazard ratio; n.i., not included in the model after stepwise selection; all other abbreviations are explained in Supplemental Table 1.

**Supplemental Table 8. Cox regression analysis of treatment-free survival.**

| Factor                    | Univariable analysis |      |           |          | Multivariable analysis<br>(n=1,140)<br>model I |           |          | Multivariable analysis<br>(n=831)<br>model II |           |          |
|---------------------------|----------------------|------|-----------|----------|------------------------------------------------|-----------|----------|-----------------------------------------------|-----------|----------|
|                           | cases                | HR   | 95% CI    | <i>p</i> | HR                                             | 95% CI    | <i>p</i> | HR                                            | 95% CI    | <i>p</i> |
| homCD49d <sup>pos</sup> * | 1,625                | 2.35 | 2.01-2.75 | <0.0001  | 1.72                                           | 1.42-2.10 | <0.0001  | 1.37                                          | 1.06-1.76 | 0.015    |
| bimCD49d <sup>+</sup>     | 1,625                | 1.74 | 1.41-2.11 | <0.0001  | 1.63                                           | 1.30-2.03 | <0.0001  | 1.48                                          | 1.13-1.93 | 0.0039   |
| UM <i>IGHV</i>            | 1,485                | 3.7  | 3.19-4.30 | <0.0001  | 2.67                                           | 2.21-3.23 | <0.0001  | 2.62                                          | 2.08-3.30 | <0.0001  |
| del17p                    | 1,509                | 2.84 | 2.26-3.58 | <0.0001  | 1.61                                           | 1.17-2.21 | 0.0034   | 1.97                                          | 1.38-2.83 | 0.0002   |
| del11q                    | 1,509                | 3.33 | 2.72-4.09 | <0.0001  | 1.81                                           | 1.44-2.27 | <0.0001  | 1.75                                          | 1.32-2.34 | 0.0001   |
| tri12                     | 1,509                | 2.2  | 1.81-2.65 | <0.0001  | n.i.                                           | n.i.      | n.i.     | n.i.                                          | n.i.      | n.i.     |
| <i>TP53</i> mutated       | 1,349                | 2.25 | 1.83-2.78 | <0.0001  | 1.37                                           | 1.03-1.82 | 0.0290   | 1.50                                          | 1.06-2.12 | 0.0203   |
| <i>NOTCH1</i> mutated     | 1,543                | 2.24 | 1.91-2.63 | <0.0001  | 1.32                                           | 1.08-1.60 | 0.0049   | 1.32                                          | 1.02-1.69 | 0.0311   |
| β2M >ULN                  | 1,098                | 3.36 | 2.79-4.06 | <0.0001  | -                                              | -         | -        | 2.45                                          | 1.96-3.05 | <0.0001  |

All factors used in univariable analyses were entered in the multivariable analysis;

\*homCD49d<sup>pos</sup> refers to CLL cases with ≥30% homogeneous expression of CD49d; †bimCD49d refers to CLL cases with bimodal expression of CD49d.

Abbreviations are explained in Supplemental Tables 1 and 6.

**Supplemental Table 9. Comparison of multivariable Cox regression analyses of overall survival (n=1,045).**

| Factor               | CD49d <sup>pos</sup> = CD49d $\geq$ 30%* |           |          | CD49d <sup>pos</sup> =homCD49d <sup>pos</sup> +bimCD49d <sup>†</sup> |           |          |
|----------------------|------------------------------------------|-----------|----------|----------------------------------------------------------------------|-----------|----------|
|                      | HR                                       | 95% CI    | <i>p</i> | HR                                                                   | 95% CI    | <i>p</i> |
| CD49d <sup>pos</sup> | 1.68                                     | 1.26-2.25 | 0.0005   | 2.13                                                                 | 1.55-2.91 | <0.0001  |
| age >65              | 4.04                                     | 2.95-5.52 | <0.0001  | 4.06                                                                 | 2.97-5.55 | <0.0001  |
| Rai stage II-IV      | 1.87                                     | 1.39-2.53 | <0.0001  | 1.82                                                                 | 1.35-2.45 | <0.0001  |
| UM <i>IGHV</i>       | 2.45                                     | 1.82-3.28 | <0.0001  | 2.42                                                                 | 1.80-3.23 | <0.0001  |
| <i>TP53</i> mutated  | 2.32                                     | 1.64-3.28 | <0.0001  | 2.33                                                                 | 1.65-3.29 | <0.0001  |

The factors entered in the multivariable analyses were those resulting from the multivariable model I reported in Table 1.

\*CD49d<sup>pos</sup> cases were defined as cases with CD49d expression  $\geq$ 30% cut-off; <sup>†</sup>CD49d<sup>pos</sup> cases were obtained by combining cases with  $\geq$ 30% homogeneous CD49d expression and cases with CD49d bimodal expression. Abbreviations are explained in Supplemental Tables 1 and 6.

Supplemental Figure 1

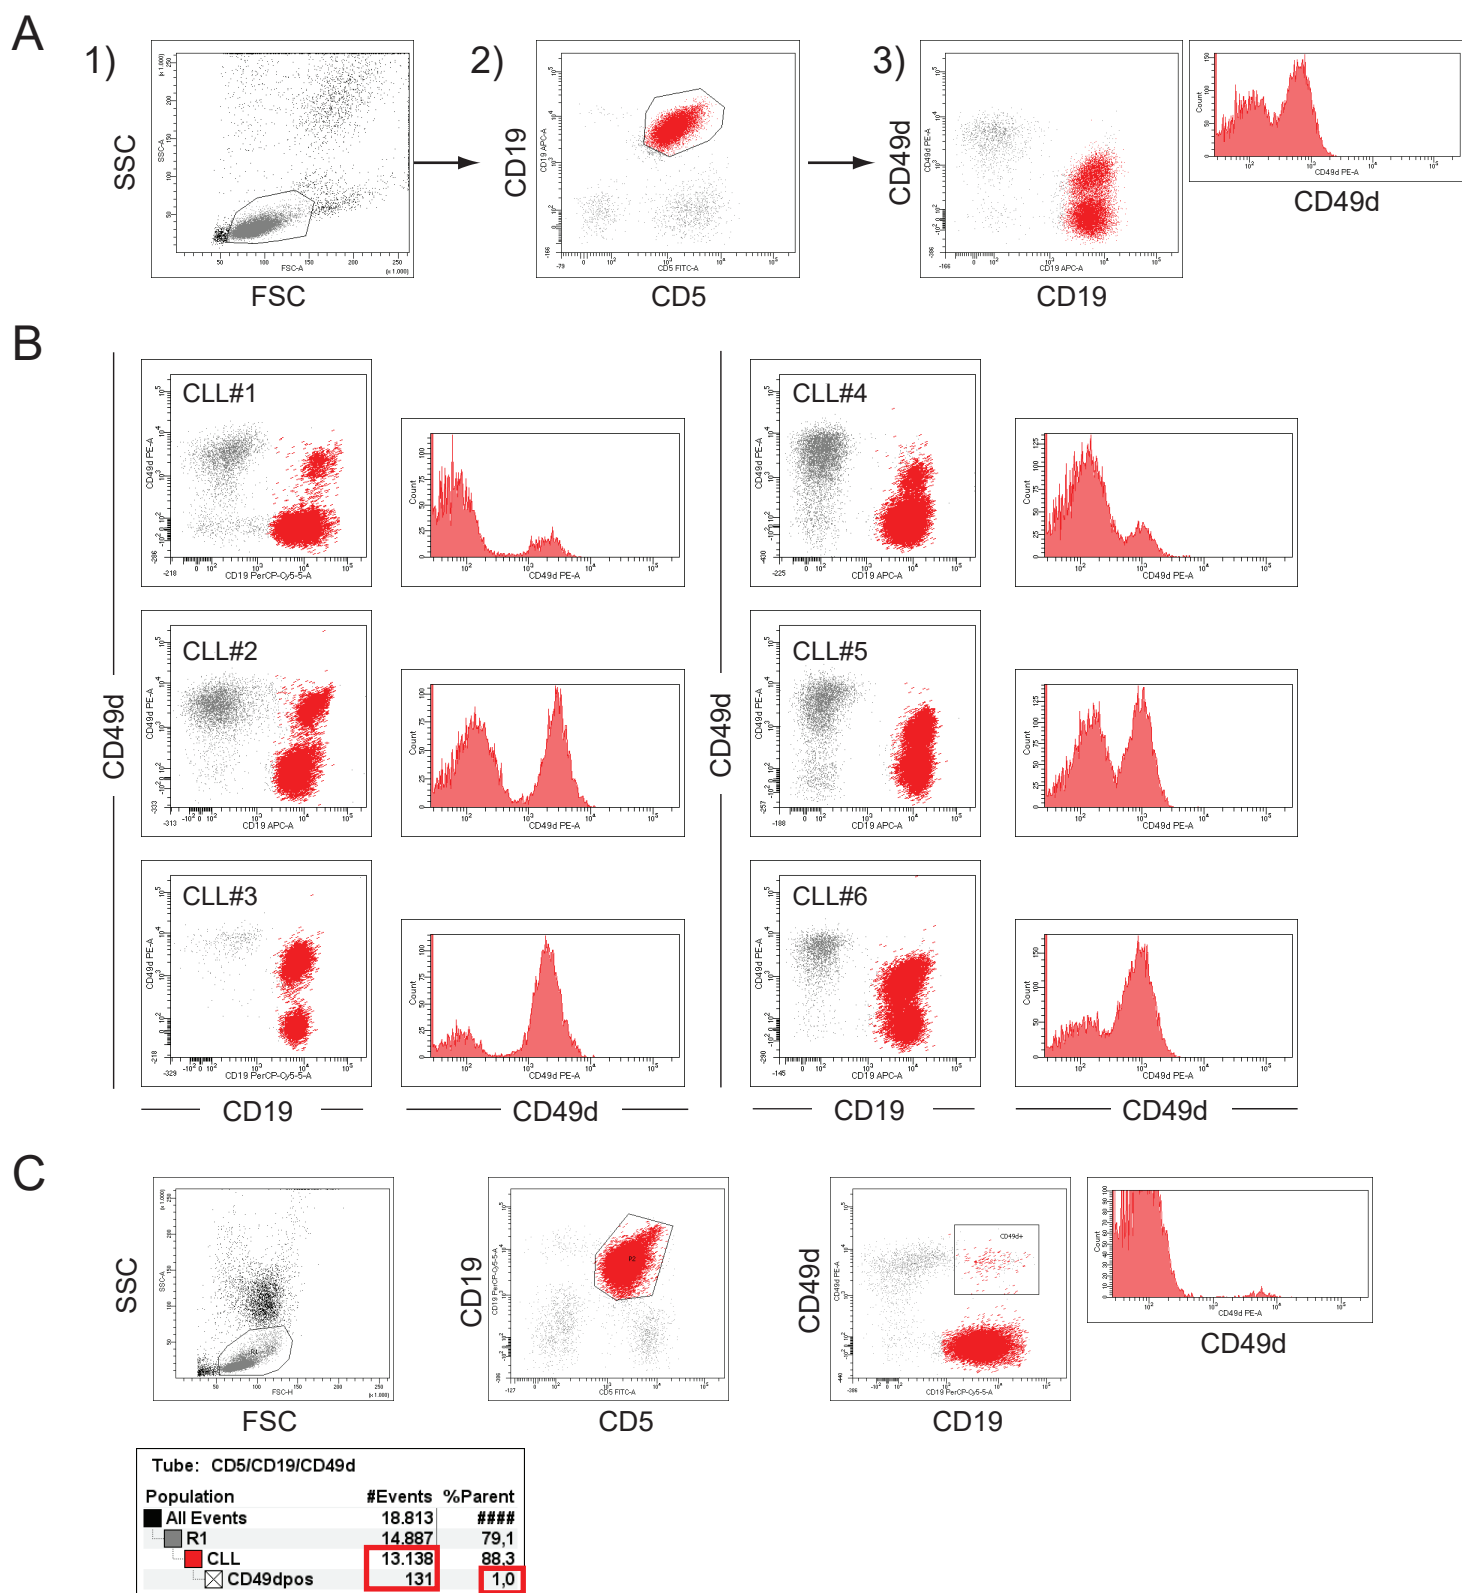

**Supplemental Figure 1. Guidelines for the analysis of CD49d bimodal expression.** (A) Gating strategy. 1) The lymphocyte population is selected on a forward- versus side-scatter (FSC/SSC) plot (R1); 2) CLL cells (CD19+CD5+) are selected on a CD5 versus CD19 dot plot gated in R1; 3) CD49d expression is displayed both in a CD19 versus CD49d dot plot and in a histogram plot in linear scale, gated in the CLL region; (B) Bimodality for CD49d is defined as the presence of either two well-defined and separate peaks (see representative CLL cases #1-3, left panels) or two adjacent but distinct peaks within the malignant clone (see representative CLL cases #4-6, right panels); (C) Flow cytometry analysis following the gating strategy reported in (A) of a representative CLL sample with CD49d bimodal expression characterized by the presence of 1% CD49d<sup>pos</sup> cells. The 1% value corresponds to the lower limit of detection of a distinct CD49d<sup>pos</sup> population, i.e. at least 100 CD49d<sup>pos</sup> cells over 10,000 total cells (lower panel, red boxes).

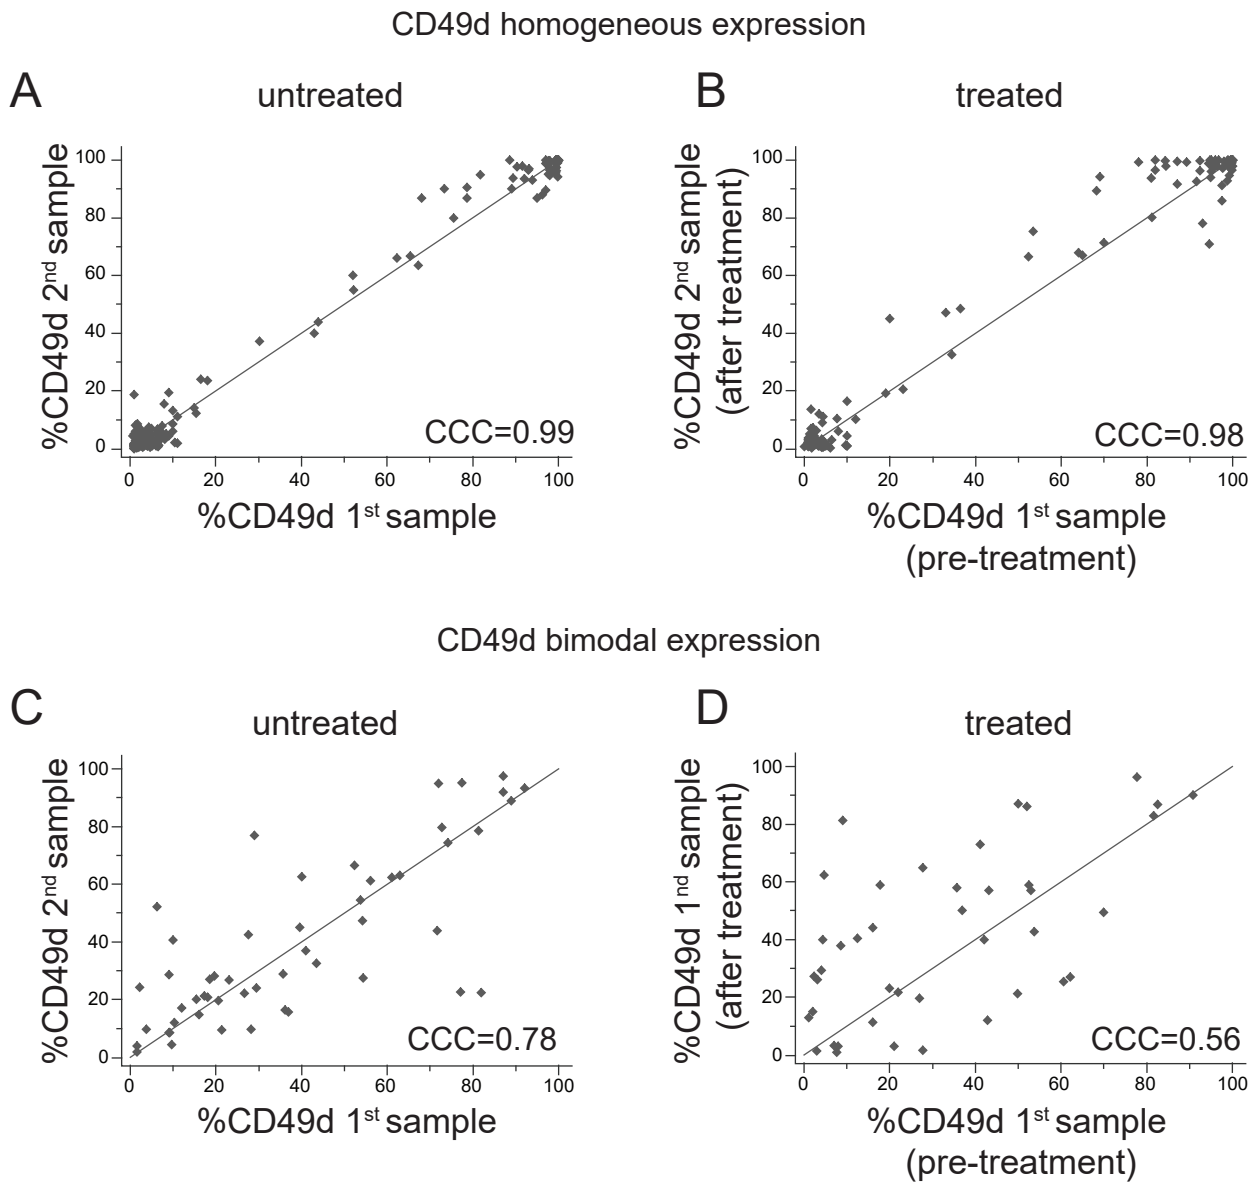

**Supplemental Figure 2. CD49d expression over time.** CD49d expression was evaluated in two sequential samples from 322 CLL cases with homogeneous CD49d expression (A-B) and 94 CLL cases with CD49d bimodal expression (C-D), either untreated (A, C) or treated between the samples (B, D). CD49d % expression values of the first and second samples are reported in x-axis and y-axis respectively. The concordance correlation coefficient (CCC) values are reported in each graph.

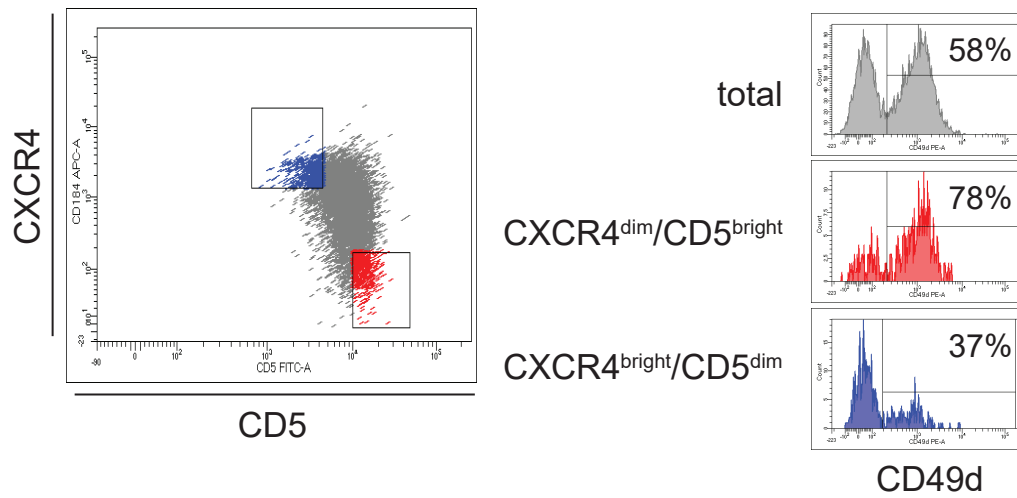

**Supplemental Figure 3. Flow cytometry analysis to determine the amount of CD49d<sup>pos</sup> cells in intra-clonal populations from bimodal CLL.** Flow cytometry analysis of intra-clonal subpopulations with variable reciprocal densities of CXCR4/CD5 in one representative CLL case with CD49d bimodal expression. CLL subpopulations were gated on the basis of a CXCR4<sup>dim</sup>/CD5<sup>bright</sup> (red) and a CXCR4<sup>bright</sup>/CD5<sup>dim</sup> (blue) expression. The histogram plots on the right show CD49d expression in the context of the total CLL population (grey), and in the CXCR4<sup>dim</sup>/CD5<sup>bright</sup> (red) and CXCR4<sup>bright</sup>/CD5<sup>dim</sup> (blue) CLL fractions;

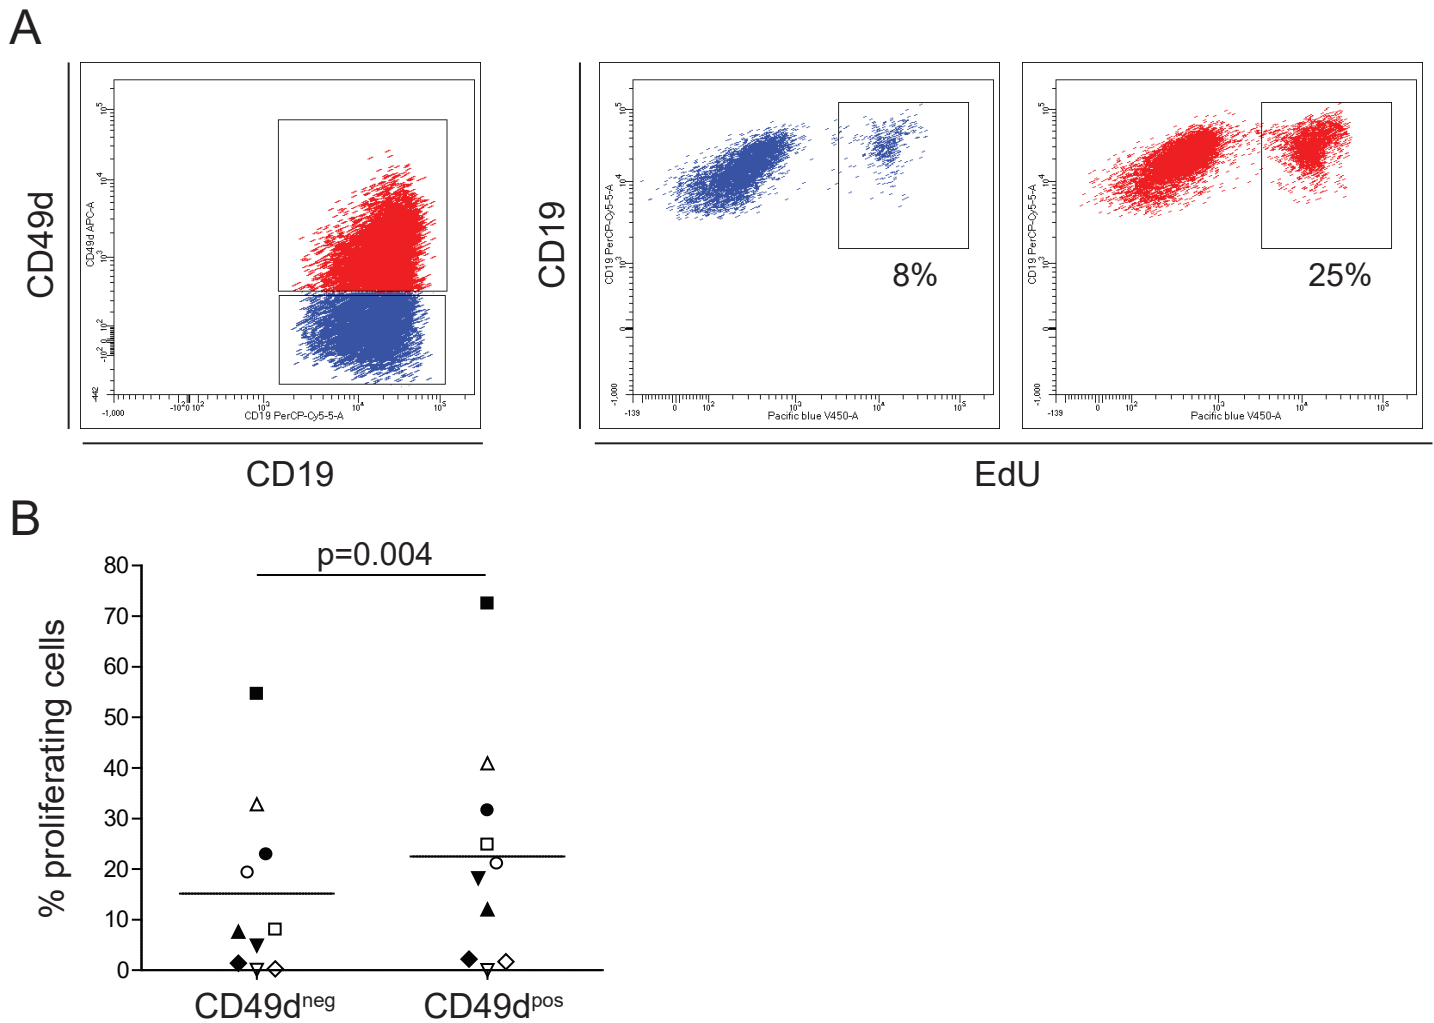

**Supplemental Figure 4. Proliferation rates in CD49d<sup>neg</sup> and CD49d<sup>pos</sup> fractions from bimCD49d CLL.** Percent of proliferating cells in CD49d<sup>neg</sup> and CD49d<sup>pos</sup> CLL fractions, as identified by the incorporation of 5-ethynyl-2'-deoxyuridine (EdU) following 48 hours co-culture with stromal cells and concomitant stimulation with the TLR9 agonist CpG. (A) Flow cytometry analysis in one representative CLL case with CD49d bimodal expression. CD49d<sup>neg</sup> (blue) and CD49d<sup>pos</sup> (red) CLL population were gated on a CD19 versus CD49d dot plot. Proliferating cells were then identified by positive staining with an anti-EdU-Pacific blue reagent on an EdU versus CD19 dot plot. (B) Percent of proliferating cells in the CD49d<sup>neg</sup> and CD49d<sup>pos</sup> fractions from 10 CLL cases; p value refers to the Mann Whitney test.



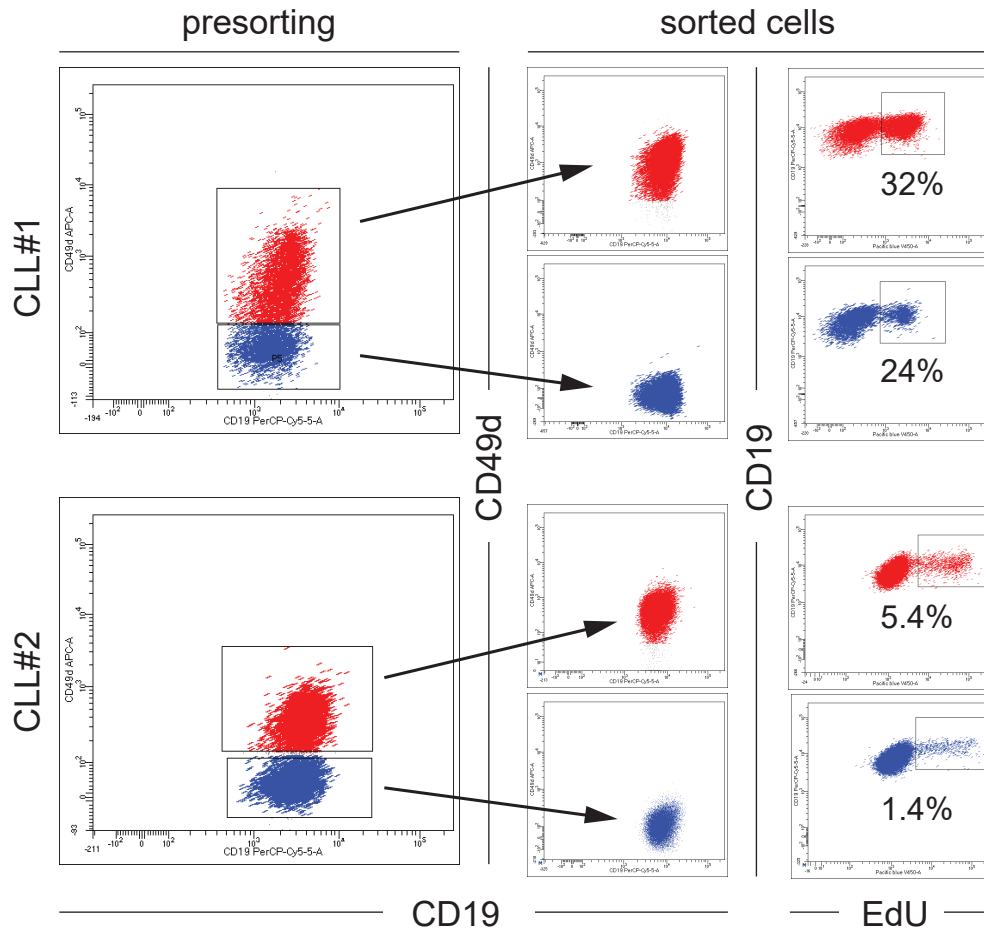

**Supplemental Figure 5. Flow cytometry analysis of proliferation rates in CD49d<sup>neg</sup> and CD49d<sup>pos</sup> sorted fractions from bimodal CD49d CLL.** Sorted CD49d<sup>neg</sup> and CD49d<sup>pos</sup> fractions from two CLL cases with bimodal CD49d expression were cultured for 48 hours with stromal cells and concomitant stimulation with the TLR9 agonist CpG. For cell sorting, CD49d<sup>neg</sup> (blue) and CD49d<sup>pos</sup> (red) CLL population were gated on a CD19 versus CD49d dot plot (dot plots on the left). Dot plots in the middle show CD19 versus CD49d staining in the sorted fractions after 48 hours co-culture. Dot plots on the right show the proliferating cells in the sorted CD49d<sup>neg</sup> and CD49d<sup>pos</sup> fractions identified by positive staining with an anti-5-ethynyl-2'-deoxyuridine (EdU)-Pacific blue reagent on a EdU versus CD19 dot plot.

Supplemental Figure 6

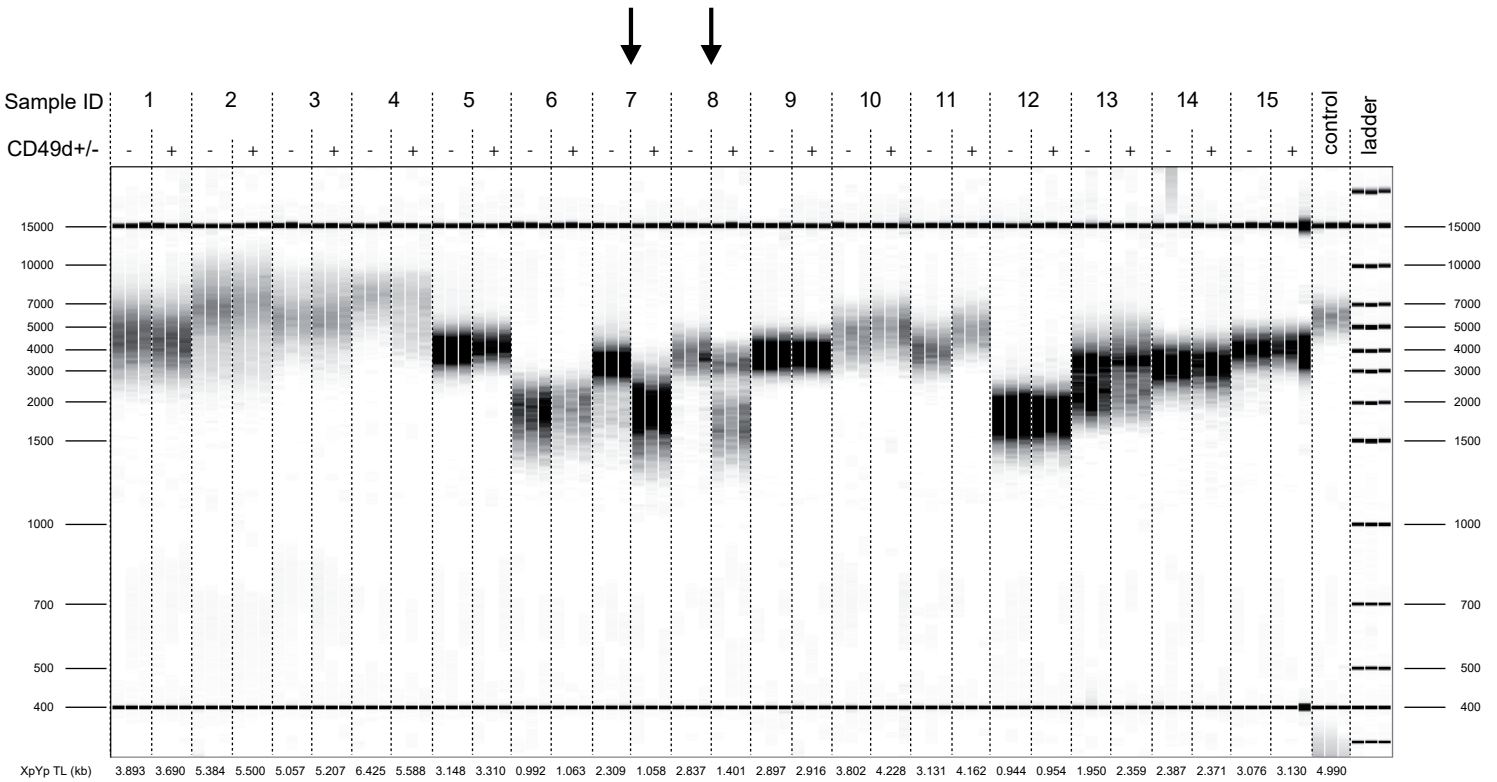

**Supplemental Figure 6. Telomere length analysis in paired CD49d<sup>neg</sup> and CD49d<sup>pos</sup> CLL sub-populations.** Paired analysis of telomere lengths (XpYp) of CD49d<sup>neg</sup> and CD49d<sup>pos</sup> sub-populations derived from 15 CLL patients were assessed by single telomere length analysis assay. The mean telomere length for each paired samples, analysed in triplicates, is reported below the gel image. Arrows indicate the two CLL samples (CLL#7 and CLL#8) displaying lower telomere length (>1kb difference) in CD49d<sup>pos</sup> vs CD49d<sup>neg</sup> sub-populations.

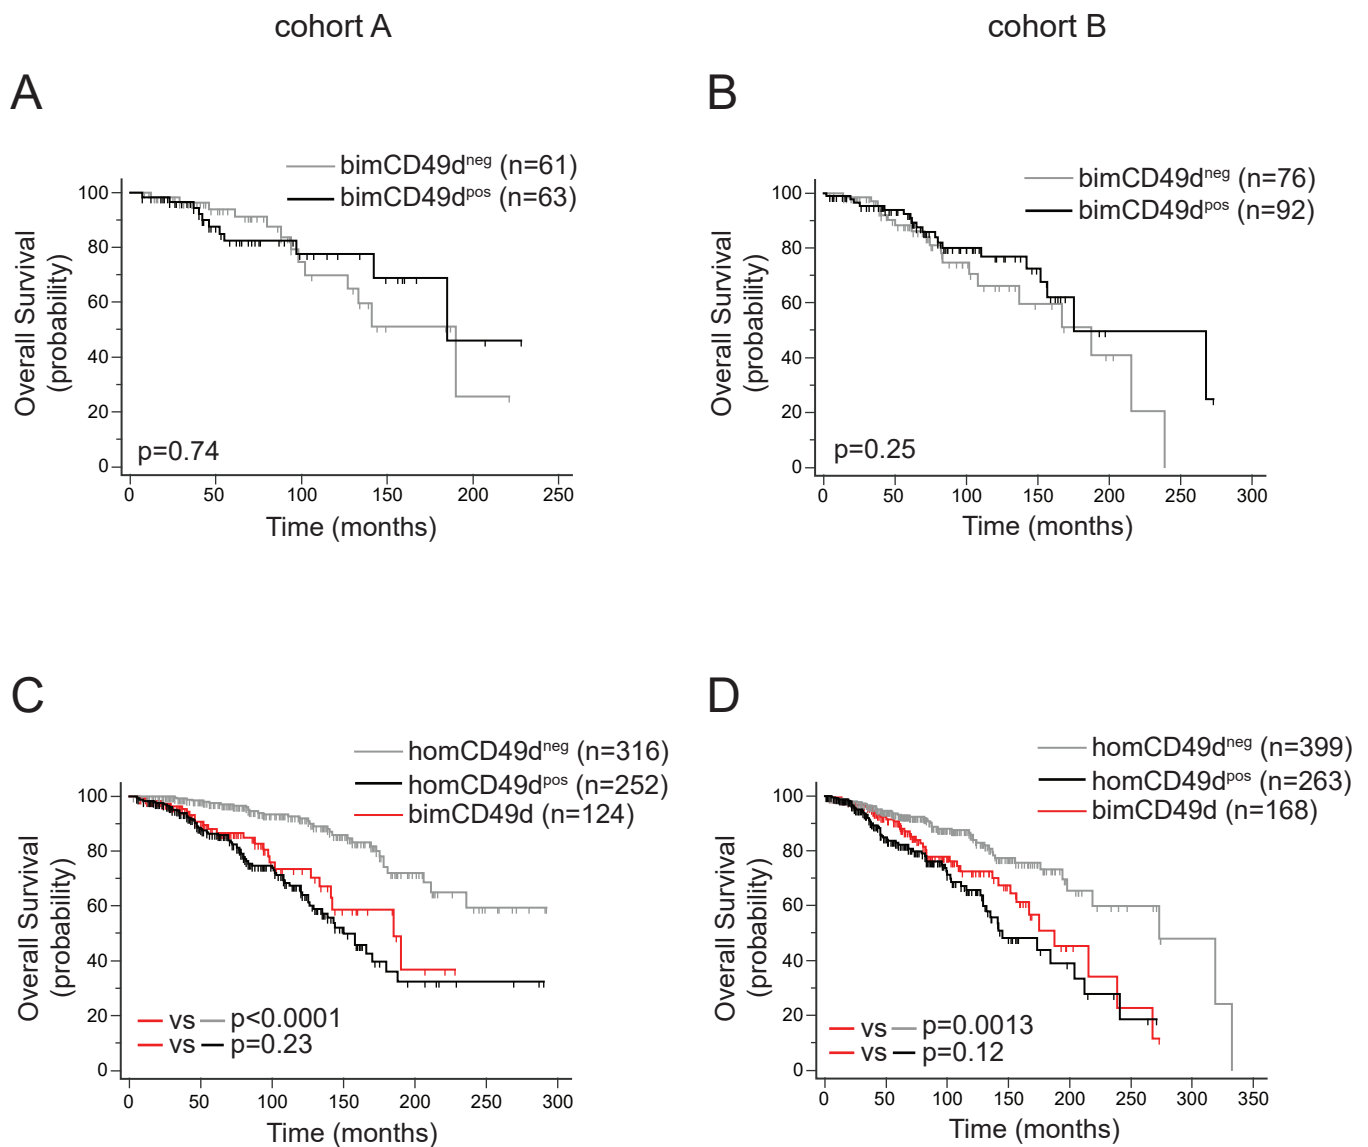

**Supplemental Figure 7. Clinical impact of CD49d bimodal expression.** (A-B) Overall survival Kaplan-Meier curves of bimCD49d CLL cases from cohort A (A) and cohort B (B) split in bimCD49d<sup>neg</sup> (grey curves) and bimCD49d<sup>pos</sup> (black curves) groups according to the 30% cut-off; (C-D) Overall survival Kaplan-Meier curves of CLL cases with bimodal CD49d expression (bimCD49d, red curves), homogeneous negative (homCD49d<sup>neg</sup>, grey curves) and homogeneous positive (homCD49d<sup>pos</sup>, black curves) CD49d expression in cohort A (C) and cohort B (D); p values refer to the log-rank test.

**A** bimCD49d CLL cohort A

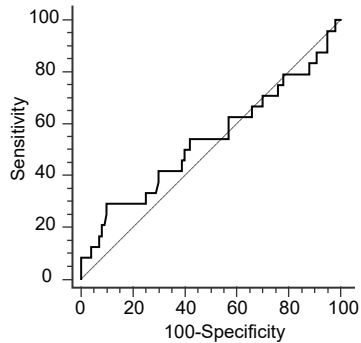

**B** bimCD49d CLL cohort B

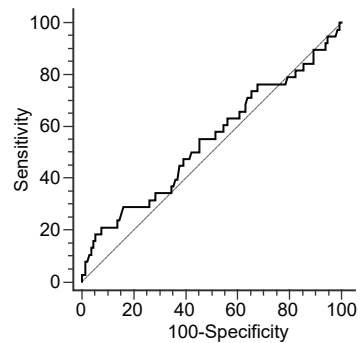

**Supplemental Figure 8. Receiver Operating Characteristics' (ROC) curve analysis in CLL with CD49d bimodal expression using the overall survival readout.** ROC curve analysis was performed with bimCD49d CLL from cohort A (A) and cohort B (B) to find possible cut-off values able to separate CLL in two groups with different overall survival probabilities.

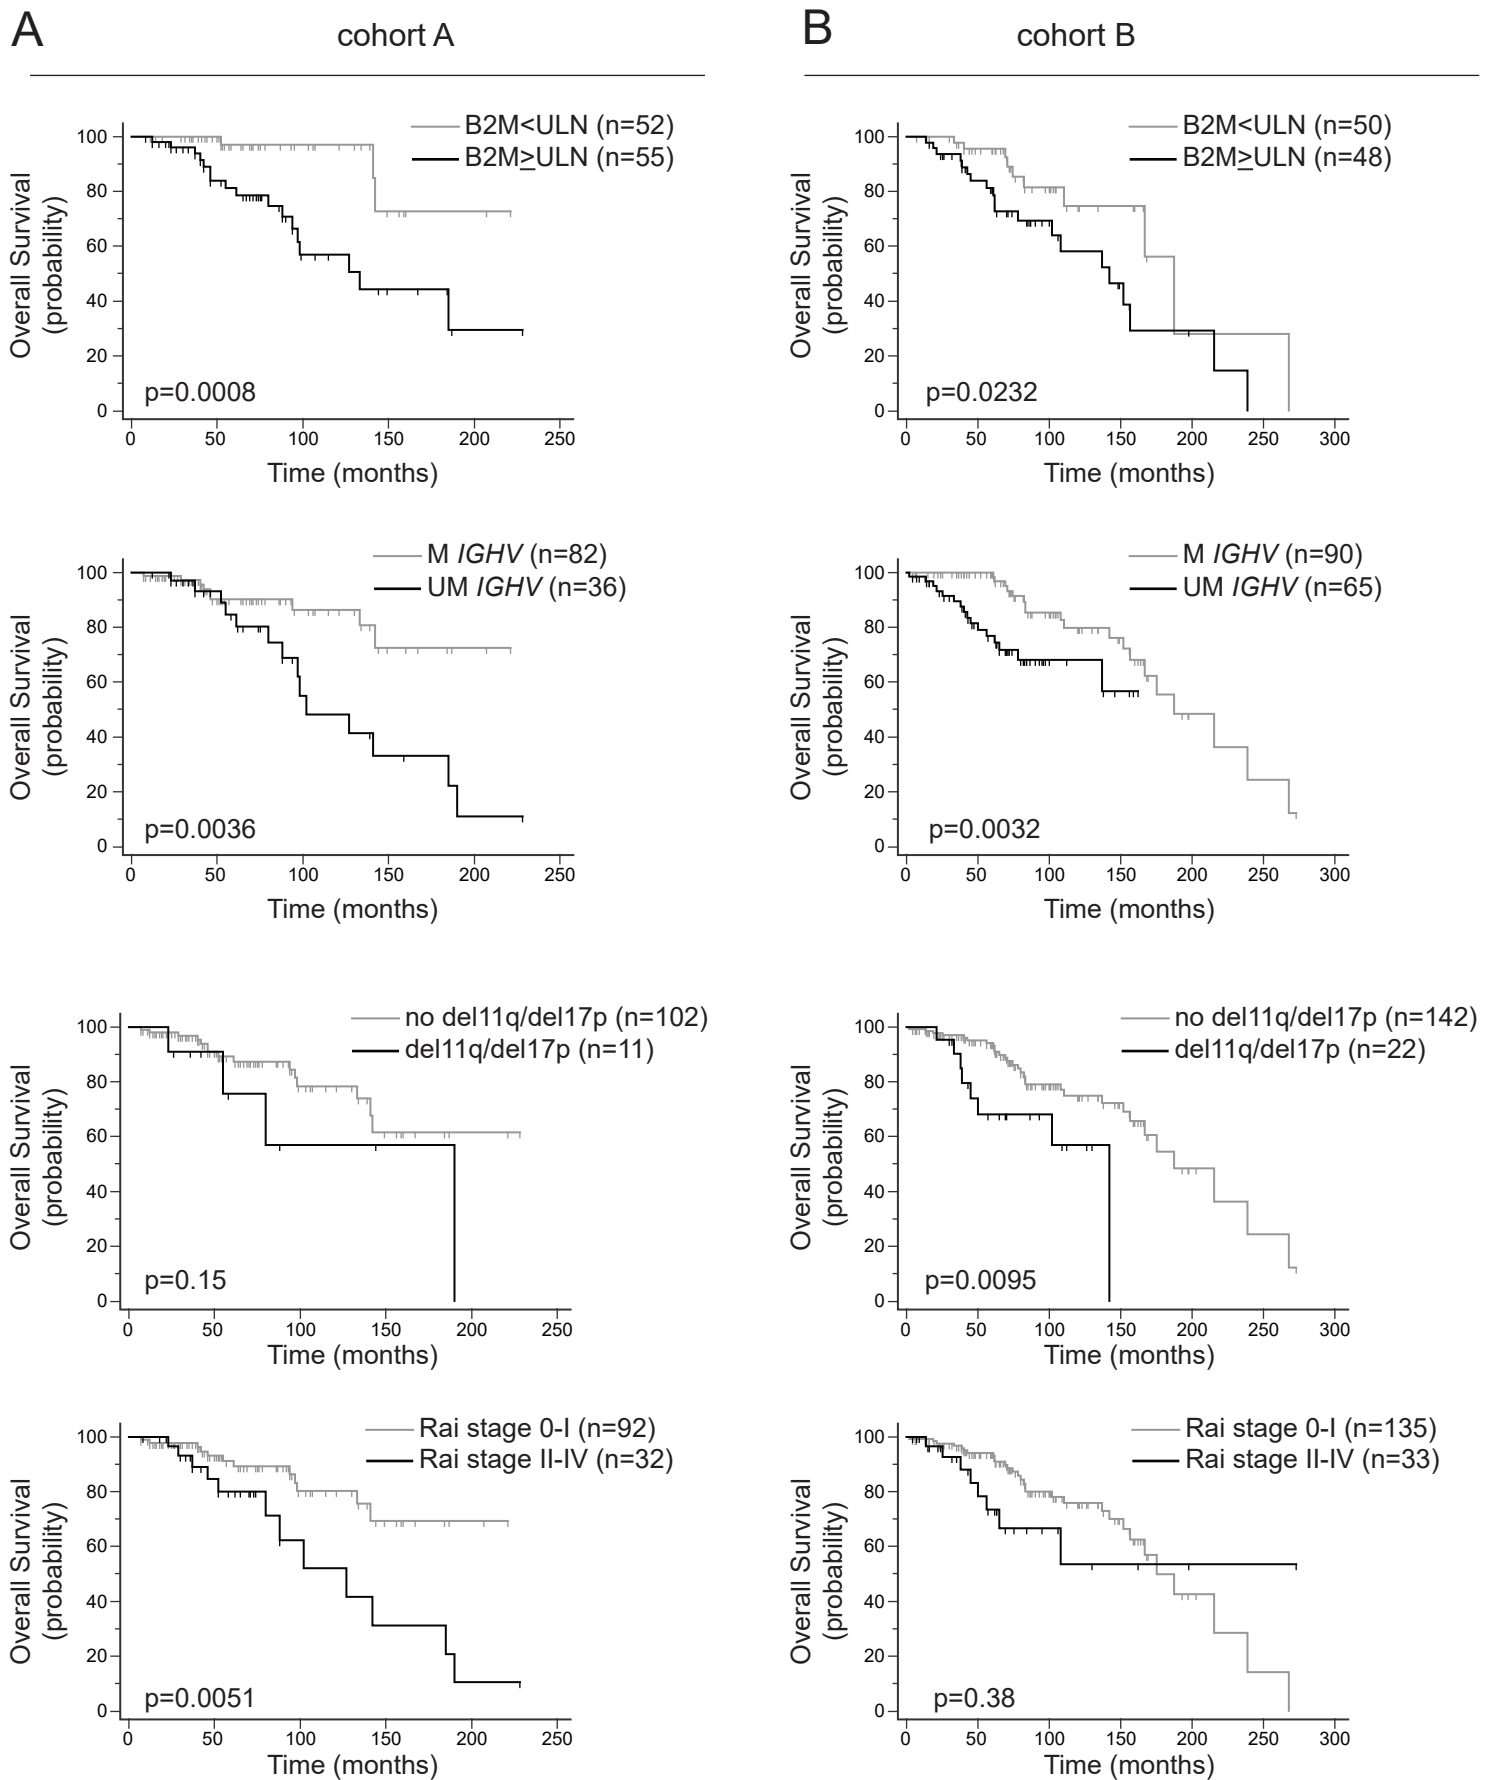

**Supplemental Figure 9. Clinical impact as OS predictors of the main clinical and biological parameters in CLL from cohort A and cohort B.** Overall survival Kaplan-Meier curves of bimCD49d CLL from cohort A (A) and cohort B (B) split in two groups according to: beta-2 microglobulin (B2M) levels (ULN=upper limit of normal), *IGHV* mutational status, presence of either del11q or del17p by FISH, Rai stage; p values refer to the log-rank test.

**A** bimCD49d CLL cohort A

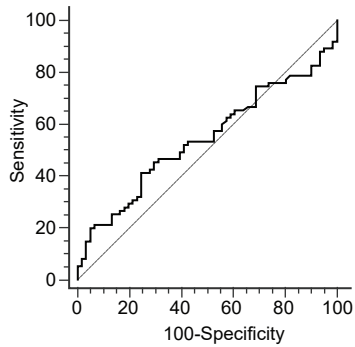

**B** bimCD49d CLL cohort B

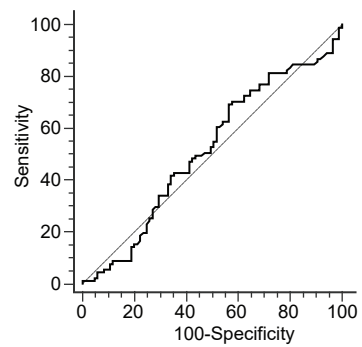

**Supplemental Figure 10. Receiver Operating Characteristics' (ROC) curve analysis in CLL with CD49d bimodal expression using the treatment-free survival readout.** ROC curve analysis was performed with bimCD49d CLL from cohort A (A) and cohort B (B) to find possible cut-off values able to separate CLL in two groups with different treatment-free survival probabilities.

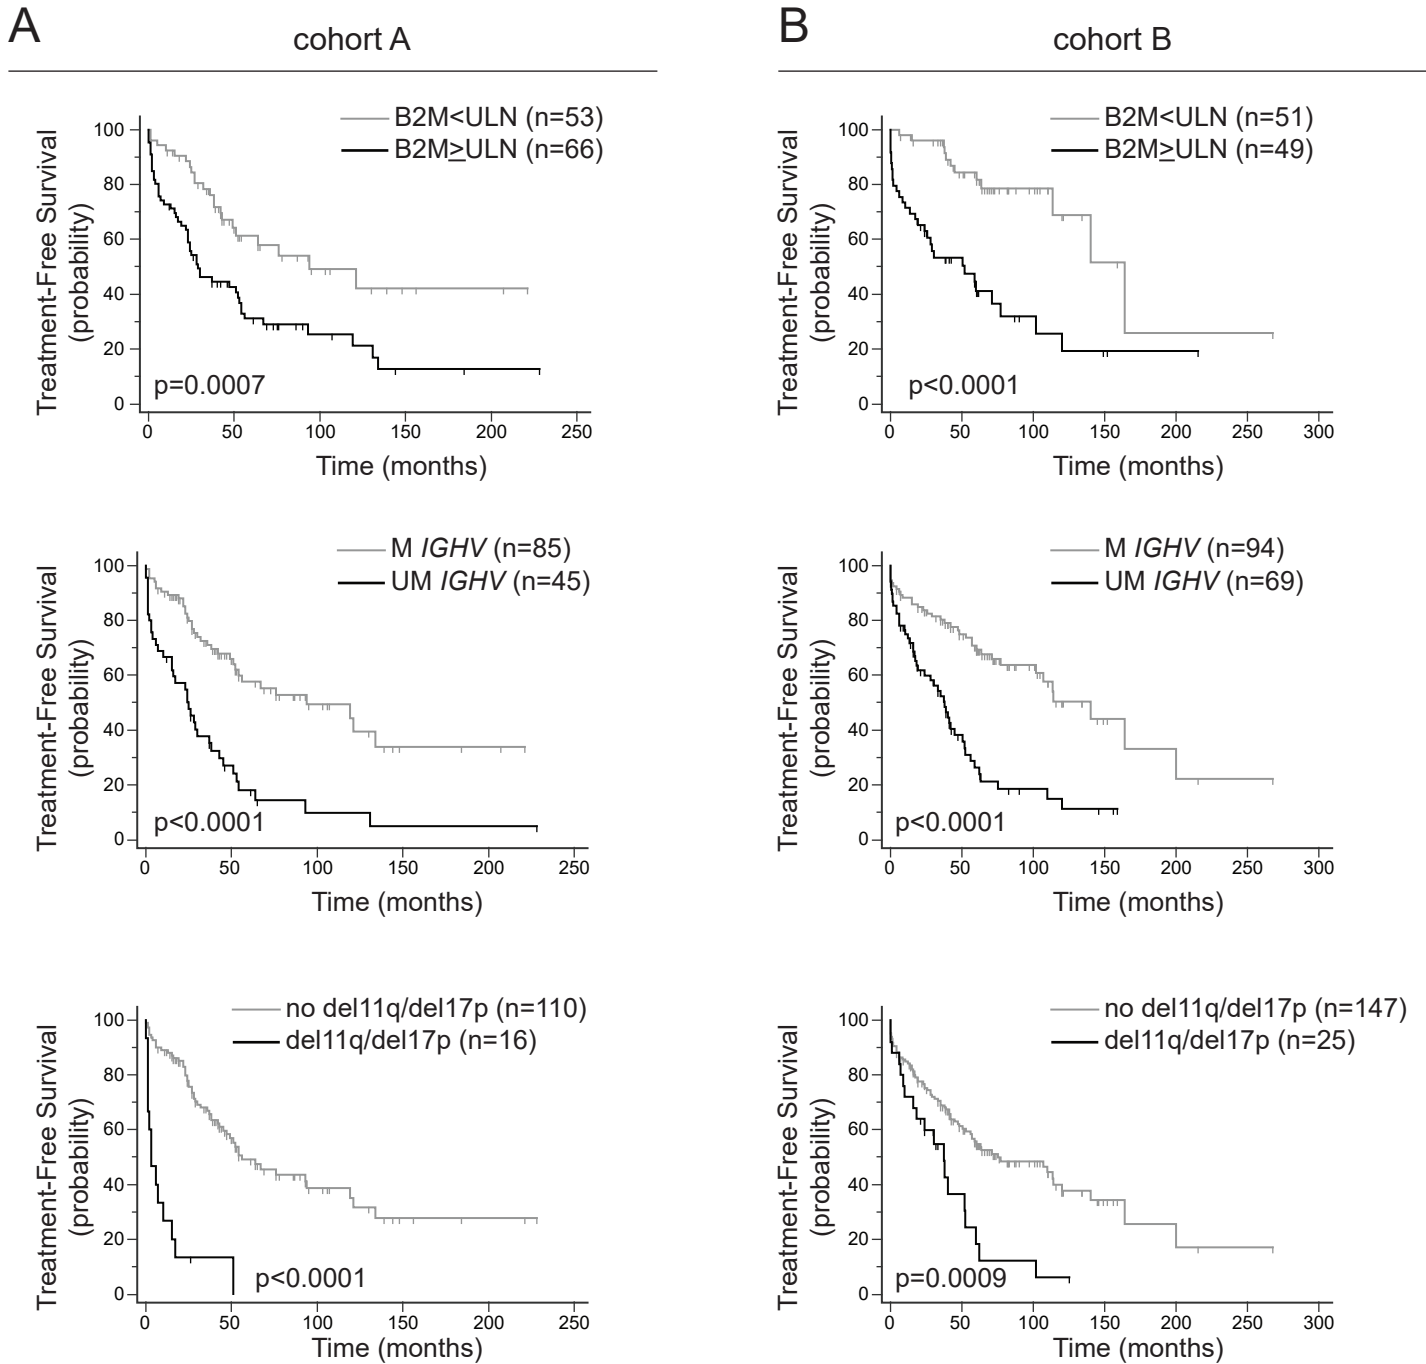

**Supplemental Figure 11. Clinical impact as TFS predictors of the main clinical and biological parameters in CLL from cohort A and cohort B.** Treatment-free survival Kaplan-Meier curves of bimCD49d CLL from cohort A (A) and cohort B (B) split in two groups according to: beta-2 microglobulin (B2M) levels (ULN=upper limit of normal), *IGHV* mutational status, presence of either del11q or del17p by FISH; p values refer to the log-rank test.

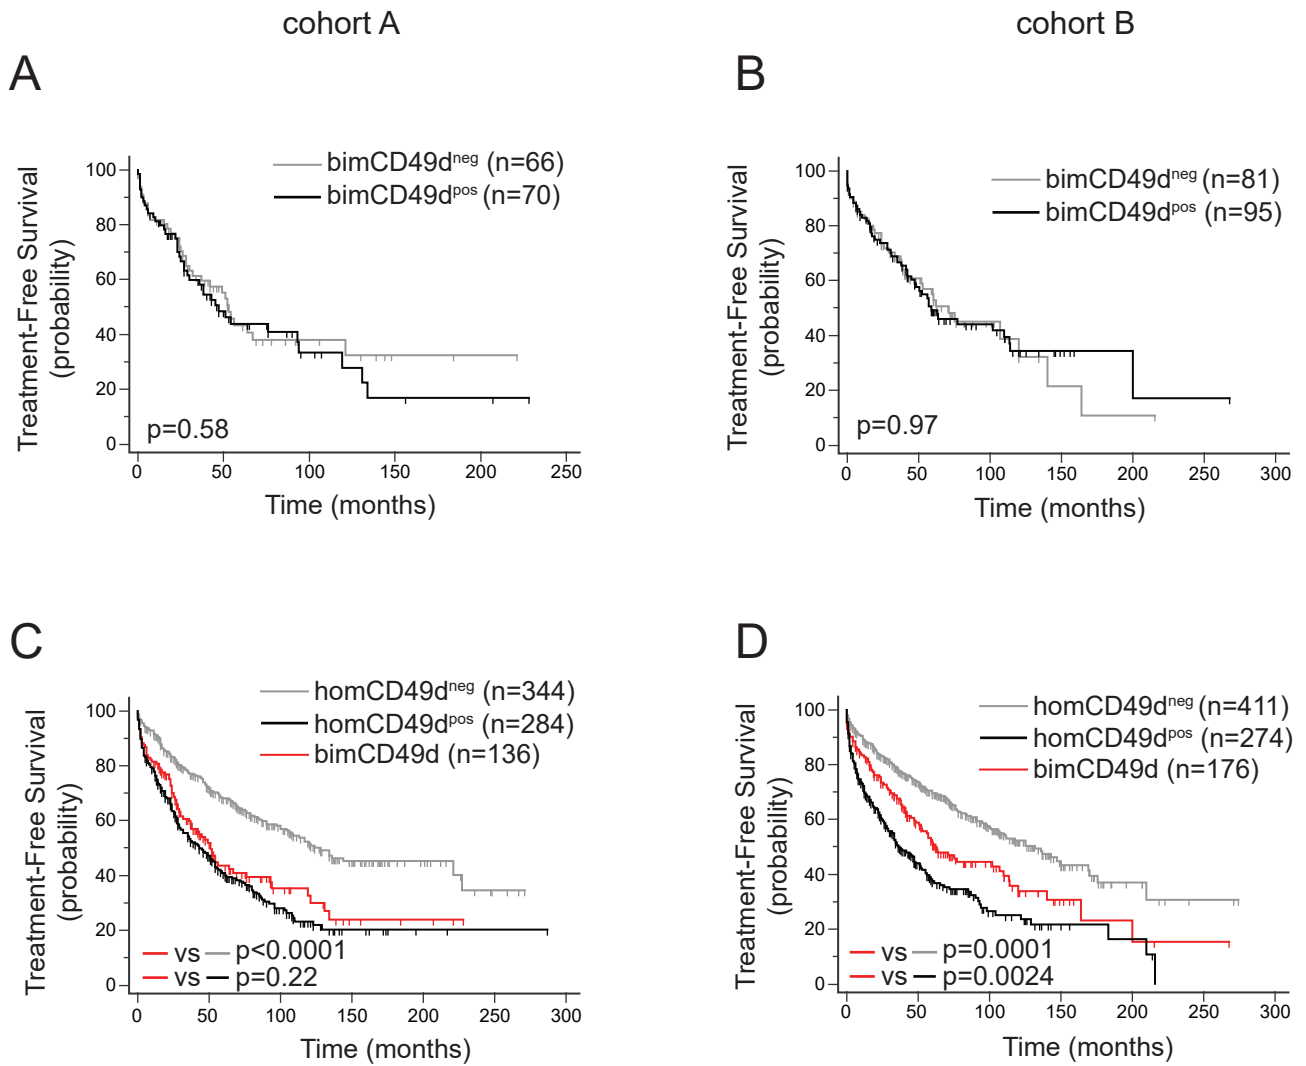

**Supplemental Figure 12. Clinical impact of CD49d expression in bimCD49d in terms of treatment-free survival.** (A-B) Treatment-free survival Kaplan-Meier curves of bimCD49d CLL cases from cohort A (A) and cohort B (B) split in bimCD49d<sup>neg</sup> (grey curves) and bimCD49d<sup>pos</sup> (black curves) groups according to the 30% cutoff; (C-D) Treatment-free survival Kaplan-Meier curves of CLL cases with bimodal CD49d expression (bimCD49d, red curves), homogeneous negative (homCD49d<sup>neg</sup>, grey curves) and homogeneous positive (homCD49d<sup>pos</sup>, black curves) CD49d expression in cohort A (C) and cohort B (D); p values refer to the log-rank test.



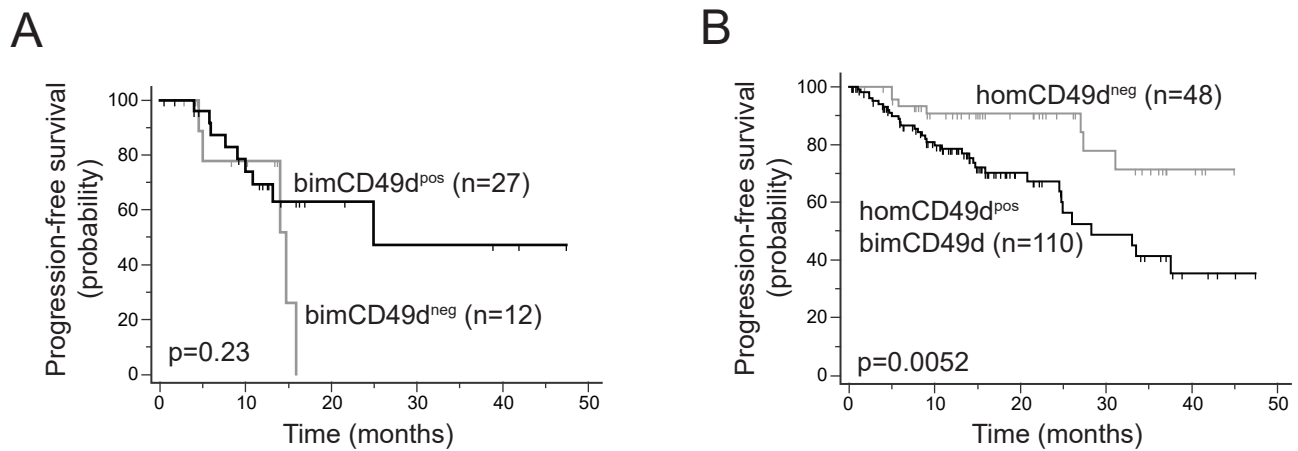

**Supplemental Figure 13. Clinical impact of CD49d expression in the context of ibrutinib treatment.**

(A) Progression-free survival Kaplan-Meier curves of ibrutinib-treated CLL cases with CD49d bimodal expression split in CD49d<sup>neg</sup> (grey curve) and CD49d<sup>pos</sup> (black curve) groups according to the 30% cut-off; (B) Progression-free survival Kaplan-Meier curves of ibrutinib-treated CLL cases with homogeneous negative CD49d expression (homCD49d<sup>neg</sup>, grey curve) and the merging of homogeneous positive (homCD49d<sup>pos</sup>) and bimodal CD49d (bimCD49d) expression (black curve).

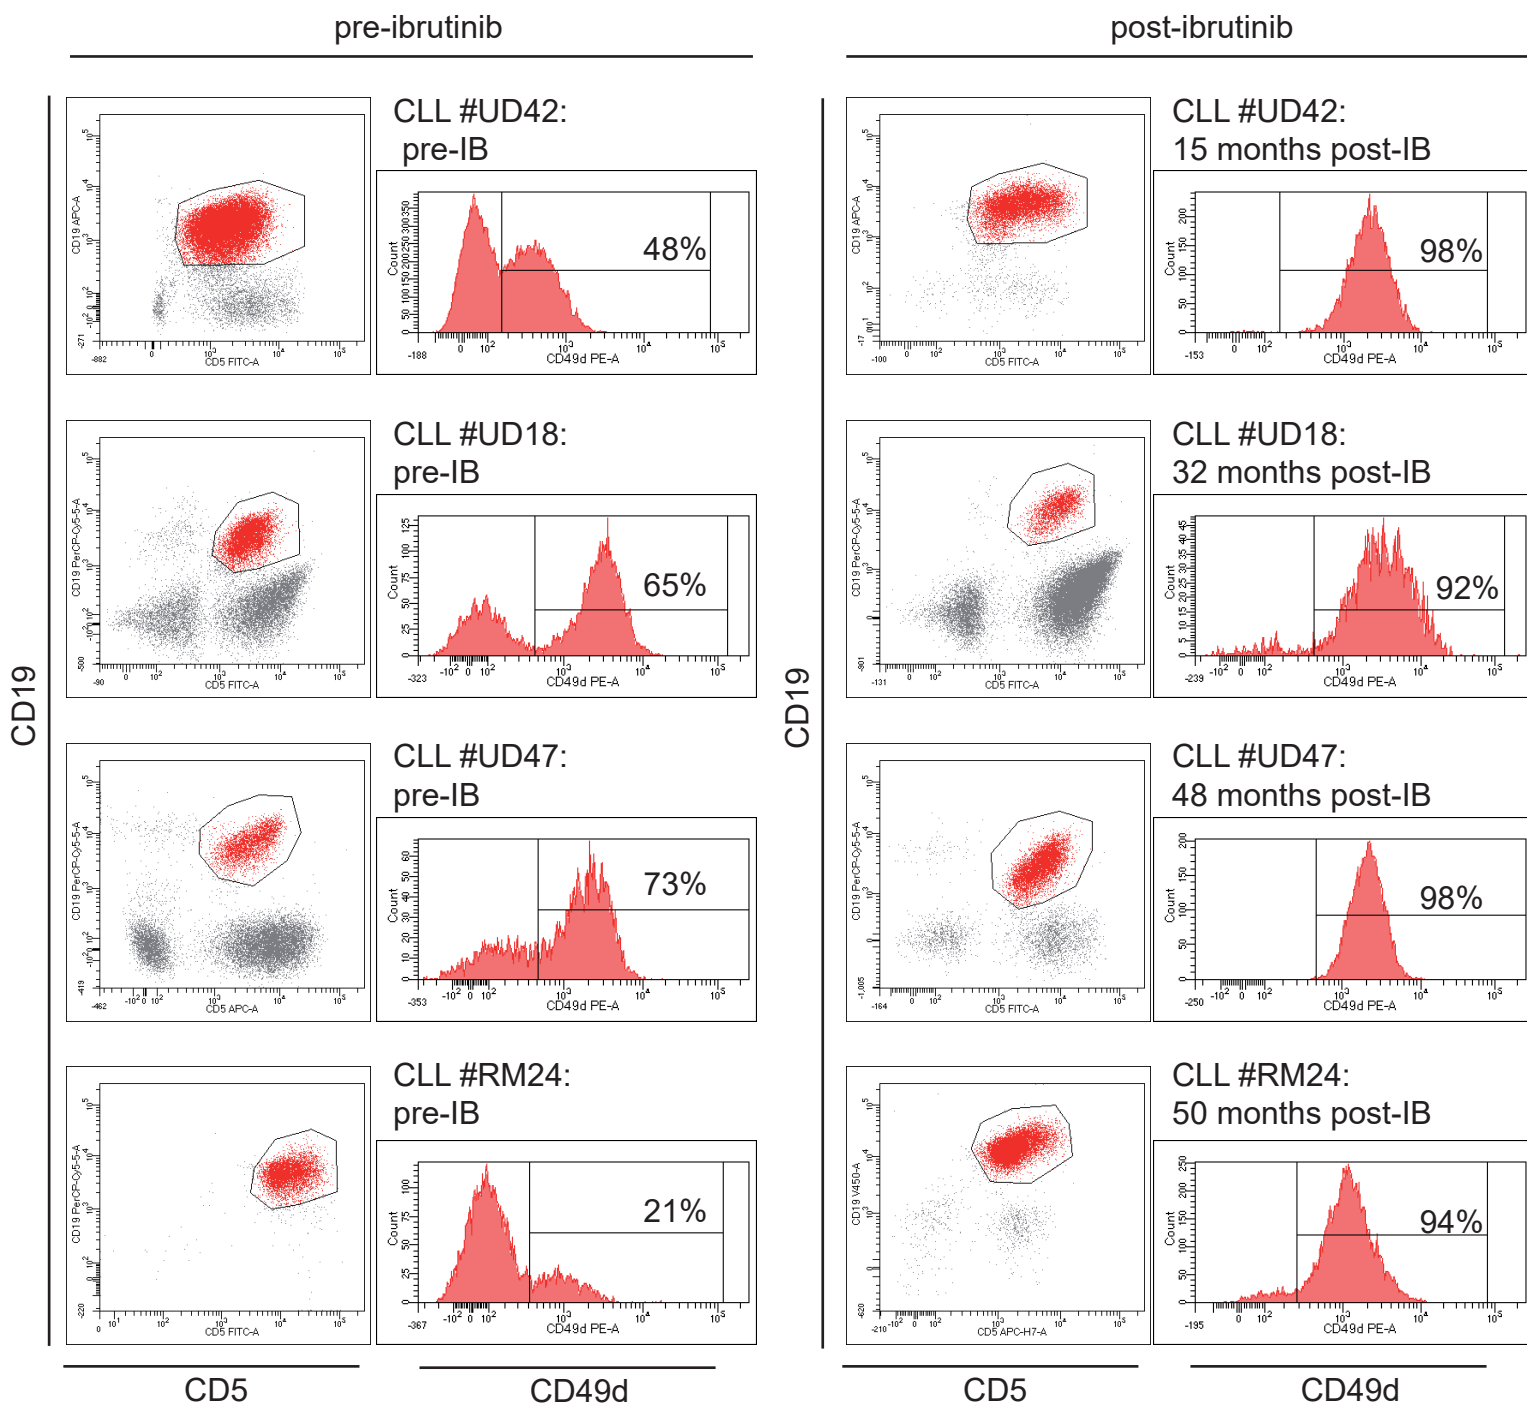

**Supplemental Figure 14. CD49d expression at pre-treatment and after ibrutinib therapy.** CD49d expression was analysed in the context of the CLL population defined by CD5+CD19+ expression. All samples were analysed at pre-treatment (pre-IB) and after the reported months of ibrutinib treatment (post-IB).
